# Supplementary material for: Formation pathways of polycyclic aromatic hydrocarbons (PAHs) in butane or butadiene flames
Source: Royal Society of Chemistry journal article supplement (doi:10.1039/d0ra08744k), 2021-01-01
Supplement: d0ra08744k1.pdf [file d0ra08744k1.pdf]

## Supporting Information

### **Investigation of Polycyclic Aromatic Hydrocarbons (PAHs) Formation**

#### **Pathways in Butane or Butadiene Flames**

**Tingting Zhang<sup>1</sup>, Guizhi Mu<sup>1</sup>, Shourong Zhang<sup>2</sup>, Jialin Hou<sup>1,\*</sup>**

1 School of Mechanical and Electrical Engineering, Shandong Agricultural

University, Taian 271018, P. R. China

\*Corresponding author: [jialinhou@163.com](mailto:jialinhou@163.com) (Jialin Hou)

| <b>Table of Contents</b>                                                                                                                                                                                                                                                         | <b>Pages</b> |
|----------------------------------------------------------------------------------------------------------------------------------------------------------------------------------------------------------------------------------------------------------------------------------|--------------|
| <b>Table S1</b> Barrier heights and reaction energies for steps involved in pyrene formation pathway from phenanthrene via C <sub>2</sub> H <sub>3</sub> addition computed at the G3(MP2, CC) level.                                                                             | 3            |
| <b>Table S2</b> Bibbs free energy barriers and reaction energies for steps involved in pyrene formation pathway from phenanthrene via C <sub>2</sub> H <sub>3</sub> addition computed at the G3(MP2, CC) level.                                                                  | 4            |
| <b>Table S3</b> Enthalpy barriers and reaction energies for steps involved in pyrene formation pathway from phenanthrene via C <sub>2</sub> H <sub>3</sub> addition computed at the G3(MP2, CC) level.                                                                           | 5            |
| <b>Table S4</b> Comparison of G3(MP2, CC) barrier heights for some steps optimized with B3LYP or CAM-B3LYP functionals.                                                                                                                                                          | 6            |
| <b>Table S5</b> The molecular geometries (in Å), vibrational frequencies (in cm <sup>-1</sup> ), moments of inertia (in amu) and zero-point vibrational energies (ZPE, in Hartree) of the chemical species (CS) and the transition states (TS) obtained at B3LYP/6-311++G(d, p). | 7            |

Table S1 Barrier heights and reaction energies for steps involved in pyrene formation pathway

from phenanthrene via C<sub>2</sub>H<sub>3</sub> addition computed at the G3(MP2, CC) level.

| No. | Reaction                                 | Barrier/<br>(kcal/mol) | Reaction heat/<br>(kcal/mol) |
|-----|------------------------------------------|------------------------|------------------------------|
| R1  | 2CS1=CS2                                 | 14.3                   | -119.7                       |
| R2  | CS2+H=CS3+H <sub>2</sub>                 | 22.4                   | 13.1                         |
| Ra  | CS2+O=CS3+OH                             | 292.3                  | 16.7                         |
| Rb  | CS2+OH=CS3+H <sub>2</sub> O              | 436.5                  | 0.5                          |
| R3  | CS3+C <sub>2</sub> H <sub>3</sub> =CS4   | 3.8                    | -116.2                       |
| R4  | CS4+H=CS5+H <sub>2</sub>                 | 23.6                   | 13.0                         |
| R5  | CS5=CS6                                  | 7.3                    | -39.7                        |
| R6  | CS6=CS7+H                                | 27.9                   | 16.5                         |
| R7  | CS8+C <sub>4</sub> H <sub>4</sub> =CS9   | 3.4                    | -48.1                        |
| R8  | CS9=CS10                                 | 39.1                   | 14.3                         |
| R9  | CS10=CS11                                | 38.6                   | 2.4                          |
| R10 | CS11=CS12                                | 0.4                    | -65.1                        |
| R11 | CS12=CS7+H                               | 40.5                   | 28.8                         |
| R13 | CS13+C <sub>2</sub> H <sub>3</sub> =CS14 | 5.4                    | -113.0                       |
| R14 | CS14+H=CS15+H <sub>2</sub>               | 31.0                   | 11.9                         |
| R15 | CS15=CS16                                | 5.3                    | -53.2                        |
| R16 | CS16=CS17+H                              | 38.2                   | 25.0                         |
| R17 | CS18+C <sub>4</sub> H <sub>4</sub> =CS19 | 0.4                    | -51.0                        |
| R18 | CS19=CS20                                | 39.0                   | 11.6                         |
| R19 | CS20=CS21                                | 7.9                    | -50.4                        |
| R20 | CS21=CS22                                | 37.3                   | 0.7                          |
| R21 | CS22=CS23                                | 7.1                    | -38.7                        |
| R22 | CS23=CS17+H                              | 24.2                   | 8.4                          |
| R23 | CS24+C <sub>4</sub> H <sub>4</sub> =CS25 | 4.2                    | -48.2                        |
| R24 | CS25=CS26                                | 33.3                   | -47.4                        |
| R25 | CS26=CS27                                |                        | 2.2                          |
| R26 | CS27=CS28                                | 40.7                   | 13.6                         |
| R27 | CS28=CS29                                | 1.9                    | -73.8                        |
| R28 | CS29=CS17+H                              | 41.8                   | 30.9                         |

Table S2 Bibbs free energy barriers and reaction energies for steps involved in pyrene formation

pathway from phenanthrene via C<sub>2</sub>H<sub>3</sub> addition computed at the G3(MP2, CC) level.

| No. | Reaction                                 | Barrier/<br>(kcal/mol) | Reaction heat/<br>(kcal/mol) |
|-----|------------------------------------------|------------------------|------------------------------|
| R1  | 2CS1=CS2                                 | 25.4                   | -101.9                       |
| R2  | CS2+H=CS3+H <sub>2</sub>                 | 26.8                   | 10.0                         |
| Ra  | CS2+O=CS3+OH                             | 294.5                  | 11.9                         |
| Rb  | CS2+OH=CS3+H <sub>2</sub> O              | 442.1                  | -0.7                         |
| R3  | CS3+C <sub>2</sub> H <sub>3</sub> =CS4   | 15.1                   | -97.7                        |
| R4  | CS4+H=CS5+H <sub>2</sub>                 | 28.0                   | 9.8                          |
| R5  | CS5=CS6                                  | 8.2                    | -37.1                        |
| R6  | CS6=CS7+H                                | 23.9                   | 5.6                          |
| R7  | CS8+C <sub>4</sub> H <sub>4</sub> =CS9   | 14.2                   | -34.2                        |
| R8  | CS9=CS10                                 | 37.1                   | 15.3                         |
| R9  | CS10=CS11                                | 36.2                   | 2.6                          |
| R10 | CS11=CS12                                | 0.7                    | -61.6                        |
| R11 | CS12=CS7+H                               | 35.8                   | 17.3                         |
| R13 | CS13+C <sub>2</sub> H <sub>3</sub> =CS14 | 16.5                   | -94.3                        |
| R14 | CS14+H=CS15+H <sub>2</sub>               | 35.5                   | 8.6                          |
| R15 | CS15=CS16                                | 5.7                    | -50.9                        |
| R16 | CS16=CS17+H                              | 33.8                   | 17.8                         |
| R17 | CS18+C <sub>4</sub> H <sub>4</sub> =CS19 | 9.6                    | -37.2                        |
| R18 | CS19=CS20                                | 37.0                   | 12.7                         |
| R19 | CS20=CS21                                | 9.1                    | -46.9                        |
| R20 | CS21=CS22                                | 35.0                   | 1.8                          |
| R21 | CS22=CS23                                | 7.5                    | -36.2                        |
| R22 | CS23=CS17+H                              | 20.2                   | -2.8                         |
| R23 | CS24+C <sub>4</sub> H <sub>4</sub> =CS25 | 9.6                    | -34.1                        |
| R24 | CS25=CS26                                | 30.8                   | -47.4                        |
| R25 | CS26=CS27                                | -                      | 6.2                          |
| R26 | CS27=CS28                                | 38.2                   | 14.7                         |
| R27 | CS28=CS29                                | 2.2                    | -70.8                        |
| R28 | CS29=CS17+H                              | 37.2                   | 14.5                         |

Table S3 Enthalpy barriers and reaction energies for steps involved in pyrene formation pathway from phenanthrene via C<sub>2</sub>H<sub>3</sub> addition computed at the G3(MP2, CC) level.

| No. | Reaction                                 | Barrier/<br>(kcal/mol) | Reaction heat/<br>(kcal/mol) |
|-----|------------------------------------------|------------------------|------------------------------|
| R1  | 2CS1=CS2                                 | 14.4                   | -115.8                       |
| R2  | CS2+H=CS3+H <sub>2</sub>                 | 20.4                   | 11.7                         |
| Ra  | CS2+O=CS3+OH                             | 287.5                  | 14.3                         |
| Rb  | CS2+OH=CS3+H <sub>2</sub> O              | 443.8                  | 0.6                          |
| R3  | CS3+C <sub>2</sub> H <sub>3</sub> =CS4   | 4.4                    | -111.3                       |
| R4  | CS4+H=CS5+H <sub>2</sub>                 | 21.5                   | 11.6                         |
| R5  | CS5=CS6                                  | 6.4                    | -39.1                        |
| R6  | CS6=CS7+H                                | 23.4                   | 12.0                         |
| R7  | CS8+C <sub>4</sub> H <sub>4</sub> =CS9   | 3.1                    | -46.1                        |
| R8  | CS9=CS10                                 | 36.1                   | 15.1                         |
| R9  | CS10=CS11                                | 35.6                   | 2.4                          |
| R10 | CS11=CS12                                | -0.2                   | -64.4                        |
| R11 | CS12=CS7+H                               | 35.9                   | 24.4                         |
| R13 | CS13+C <sub>2</sub> H <sub>3</sub> =CS14 | 5.9                    | -108.1                       |
| R14 | CS14+H=CS15+H <sub>2</sub>               | 28.8                   | 10.4                         |
| R15 | CS15=CS16                                | 4.5                    | -52.5                        |
| R16 | CS16=CS17+H                              | 33.6                   | 20.5                         |
| R17 | CS18+C <sub>4</sub> H <sub>4</sub> =CS19 | 0.7                    | -49.1                        |
| R18 | CS19=CS20                                | 36.0                   | 12.4                         |
| R19 | CS20=CS21                                | 7.0                    | -49.7                        |
| R20 | CS21=CS22                                | 33.7                   | 1.1                          |
| R21 | CS22=CS23                                | 6.1                    | -38.0                        |
| R22 | CS23=CS17+H                              | 20.1                   | 4.3                          |
| R23 | CS24+C <sub>4</sub> H <sub>4</sub> =CS25 | -0.5                   | -46.2                        |
| R24 | CS25=CS26                                | 29.7                   | -47.0                        |
| R25 | CS26=CS27                                | -                      | 3.4                          |
| R26 | CS27=CS28                                | 37.5                   | 14.2                         |
| R27 | CS28=CS29                                | 0.8                    | -73.0                        |
| R28 | CS29=CS17+H                              | 37.2                   | 26.3                         |

Table S4 Comparison of G3(MP2, CC) barrier heights for some steps optimized with B3LYP or CAM-B3LYP functionals.

| No. | Reaction                               | Barrier/<br>(kcal/mol)<br>B3LYP | Barrier/<br>(kcal/mol)<br>G3(MP2,CC)<br>//B3LYP | Barrier/<br>(kcal/mol)<br>cam-B3LYP | Barrier/<br>(kcal/mol)<br>G3(MP2,CC)<br>//CAM-B3LYP |
|-----|----------------------------------------|---------------------------------|-------------------------------------------------|-------------------------------------|-----------------------------------------------------|
| R6  | CS6=CS7+H                              | 32.0                            | 27.9                                            | 34.2                                | 31.5                                                |
| R7  | CS8+C <sub>4</sub> H <sub>4</sub> =CS9 | 2.0                             | 3.4                                             | 2.3                                 | 2.8                                                 |
| R10 | CS11=CS12                              | 2.8                             | 0.4                                             | 1.4                                 | 2.4                                                 |
| R16 | CS16=CS17+H                            | 32.9                            | 38.2                                            | 35.4                                | 38.2                                                |
| R18 | CS19=CS20                              | 38.7                            | 39.0                                            | 40.3                                | 33.2                                                |
| R21 | CS22=CS23                              | 5.8                             | 7.1                                             | 7.2                                 | 9.2                                                 |
| R22 | CS23=CS17+H                            | 18.3                            | 24.2                                            | 20.6                                | 19.2                                                |
| R24 | CS25=CS26                              | 23.1                            | 33.3                                            | 28.4                                | 34.2                                                |

Table S5 The molecular geometries (in Å), vibrational frequencies (in cm<sup>-1</sup>), moments of inertia (in amu) and zero-point vibrational energies (ZPE, in Hartree) of the chemical species (CS) and the transition states (TS) obtained at B3LYP/6-311++G(d, p).

| Species                       | ZPE, Hartree | i      | Ii         | Cartesian coordinates, angstroms |         |         | vi, cm <sup>-1</sup> |      |      |      |      |  |
|-------------------------------|--------------|--------|------------|----------------------------------|---------|---------|----------------------|------|------|------|------|--|
|                               |              |        |            | Atom                             | X       | Y       | Z                    |      |      |      |      |  |
| H <sub>2</sub>                | 0.010066     | A      | 1811.1983  | H                                | 0       | 0       | 0.3000               | 4418 |      |      |      |  |
|                               |              |        |            | H                                | 0       | 0       | -0.3000              |      |      |      |      |  |
| C <sub>2</sub> H <sub>2</sub> | 0.026984     | A      | 0.0000     | C                                | 0       | 0       | 0.6006               | 646  | 646  | 772  | 772  |  |
|                               |              |        |            | H                                | 0       | 0       | 1.6706               | 2062 | 3420 |      |      |  |
|                               |              | C      | 50.7186    | C                                | 0       | 0       | -0.6006              |      |      |      |      |  |
|                               |              |        |            | H                                | 0       | 0       | -1.6706              |      |      |      |      |  |
| C <sub>2</sub> H <sub>3</sub> | 0.036309     | A      | 7.5985     | C                                | 0.0616  | 0.7587  | 0.0000               | 708  | 817  | 923  | 1041 |  |
|                               |              |        |            | H                                | -0.8661 | 1.2918  | 0.0000               | 1390 | 1645 | 3037 | 3135 |  |
|                               |              | C      | 62.9195    | C                                | 0.0616  | -0.5965 | 0.0000               | 3238 |      |      |      |  |
|                               |              |        |            | H                                | -0.8629 | -1.1352 | 0.0000               |      |      |      |      |  |
|                               |              |        |            | H                                | 0.9893  | -1.1297 | 0.0000               |      |      |      |      |  |
| C <sub>4</sub> H <sub>4</sub> | 0.060916     | A      | 34.8795    | C                                | -0.4546 | 1.8603  | 0.0000               | 226  | 321  | 558  | 653  |  |
|                               |              |        |            | H                                | -0.8651 | 2.8403  | 0.0000               | 686  | 703  | 891  | 956  |  |
|                               |              | C      | 416.6870   | C                                | 0.0000  | 0.7438  | 0.0000               | 1006 | 1110 | 1320 | 1442 |  |
|                               |              |        |            | C                                | 0.5783  | -0.5558 | 0.0000               | 1662 | 2199 | 3137 | 3147 |  |
|                               |              |        |            | H                                | 1.6650  | -0.5911 | 0.0000               | 3236 |      |      | 3476 |  |
|                               |              |        |            | C                                | -0.1204 | -1.6971 | 0.0000               |      |      |      |      |  |
|                               |              |        |            | H                                | -1.2039 | -1.7004 | 0.0000               |      |      |      |      |  |
|                               |              |        |            | H                                | 0.3842  | -2.6556 | 0.0000               |      |      |      |      |  |
| CS1                           | 0.086921     | A      | 286.7623   | C                                | -1.2245 | -0.7712 | 0.0000               | 3187 | 3176 | 3174 | 3161 |  |
|                               |              |        |            | C                                | 0.0000  | -1.3956 | 0.0000               | 3155 | 1626 | 1570 | 1467 |  |
|                               |              | C      | 608.07517  | C                                | 1.2245  | -0.7712 | 0.0000               | 1460 | 1324 | 1301 | 1175 |  |
|                               |              |        |            | C                                | 1.2124  | 0.6316  | 0.0000               | 1174 | 1071 | 1048 | 1014 |  |
|                               |              |        |            | C                                | 0.0000  | 1.3225  | 0.0000               | 986  | 983  | 961  | 891  |  |
|                               |              |        |            | C                                | -1.2124 | 0.6316  | 0.0000               | 812  | 718  | 665  | 619  |  |
|                               |              |        |            | H                                | -2.1583 | -1.3223 | 0.0000               | 600  | 424  | 398  |      |  |
|                               |              |        |            | H                                | 2.1583  | -1.3223 | 0.0000               |      |      |      |      |  |
|                               |              |        |            | H                                | 2.1510  | 1.1761  | 0.0000               |      |      |      |      |  |
|                               |              |        |            | H                                | 0.0000  | 2.4065  | 0.0000               |      |      |      |      |  |
| H                             | -2.1510      | 1.1761 | 0.0000     |                                  |         |         |                      |      |      |      |      |  |
| CS2                           | 0.180770     | A      | 629.25887  | C                                | -0.7428 | 0.0000  | 0.0000               | 65   | 93   | 125  | 267  |  |
| P2                            |              | B      | 3309.93836 | C                                | -1.4638 | 1.1272  | 0.4216               | 312  | 367  | 413  | 419  |  |
|                               |              |        |            | C                                | -2.8563 | 1.1275  | 0.4218               | 502  | 556  | 625  | 628  |  |
|                               |              | C      | 3783.32350 | C                                | -3.5591 | 0.0000  | 0.0000               | 639  | 710  | 713  | 753  |  |
|                               |              |        |            | C                                | -2.8563 | -1.1275 | -0.4218              | 755  | 795  | 855  | 855  |  |
|                               |              |        |            | C                                | -1.4638 | -1.1272 | -0.4216              | 922  | 939  | 984  | 984  |  |
|                               |              |        |            | C                                | 0.7428  | 0.0000  | 0.0000               | 1001 | 1001 | 1010 | 1017 |  |
|                               |              |        |            | C                                | 1.4638  | 1.1272  | -0.4216              | 1025 | 1052 | 1066 | 1100 |  |

|     |          |   |            |   |         |         |         |      |      |      |      |
|-----|----------|---|------------|---|---------|---------|---------|------|------|------|------|
|     |          |   |            | C | 2.8563  | 1.1275  | -0.4218 | 1105 | 1182 | 1182 | 1202 |
|     |          |   |            | C | 3.5591  | 0.0000  | 0.0000  | 1209 | 1297 | 1301 | 1327 |
|     |          |   |            | C | 2.8563  | -1.1275 | 0.4218  | 1354 | 1358 | 1459 | 1487 |
|     |          |   |            | C | 1.4638  | -1.1272 | 0.4216  | 1514 | 1536 | 1607 | 1622 |
|     |          |   |            | H | -0.9284 | 2.0012  | 0.7748  | 1640 | 1642 | 3159 | 3160 |
|     |          |   |            | H | -3.3929 | 2.0069  | 0.7606  | 3165 | 3167 | 3174 | 3178 |
|     |          |   |            | H | -4.6432 | 0.0000  | 0.0000  | 3180 | 3183 | 3189 | 3191 |
|     |          |   |            | H | -3.3929 | -2.0069 | -0.7606 |      |      |      |      |
|     |          |   |            | H | -0.9284 | -2.0012 | -0.7748 |      |      |      |      |
|     |          |   |            | H | 0.9284  | 2.0012  | -0.7748 |      |      |      |      |
|     |          |   |            | H | 3.3929  | 2.0069  | -0.7606 |      |      |      |      |
|     |          |   |            | H | 4.6432  | 0.0000  | 0.0000  |      |      |      |      |
|     |          |   |            | H | 3.3929  | -2.0069 | 0.7606  |      |      |      |      |
|     |          |   |            | H | 0.9284  | -2.0012 | 0.7748  |      |      |      |      |
| CS3 | 0.167635 | A | 608.90116  | C | -0.7395 | 0.0027  | 0.0005  | 49   | 91   | 130  | 251  |
|     |          | B | 3291.26432 | C | -1.4852 | -1.1235 | -0.3017 | 314  | 381  | 413  | 419  |
|     |          | C | 3822.68754 | C | -2.8516 | -1.2271 | -0.3402 | 483  | 554  | 612  | 625  |
|     |          |   |            | C | -3.5805 | -0.0701 | -0.0262 | 639  | 693  | 705  | 741  |
|     |          |   |            | C | -2.9000 | 1.1026  | 0.3016  | 751  | 781  | 851  | 853  |
|     |          |   |            | C | -1.5071 | 1.1428  | 0.3180  | 929  | 943  | 982  | 984  |
|     |          |   |            | C | 0.7432  | 0.0015  | -0.0033 | 987  | 1000 | 1013 | 1024 |
|     |          |   |            | C | 1.4472  | -1.1788 | 0.2792  | 1048 | 1065 | 1100 | 1121 |
|     |          |   |            | C | 2.8383  | -1.1974 | 0.2805  | 1175 | 1182 | 1204 | 1239 |
|     |          |   |            | C | 3.5566  | -0.0359 | -0.0017 | 1300 | 1319 | 1323 | 1356 |
|     |          |   |            | C | 2.8695  | 1.1419  | -0.2904 | 1432 | 1472 | 1481 | 1527 |
|     |          |   |            | C | 1.4771  | 1.1603  | -0.2934 | 1567 | 1614 | 1630 | 1641 |
|     |          |   |            | H | -3.3540 | -2.1523 | -0.6006 | 3158 | 3161 | 3165 | 3168 |
|     |          |   |            | H | -4.6649 | -0.0936 | -0.0358 | 3174 | 3177 | 3183 | 3187 |
|     |          |   |            | H | -3.4601 | 1.9955  | 0.5554  | 3191 |      |      |      |
|     |          |   |            | H | -1.0025 | 2.0611  | 0.5987  |      |      |      |      |
|     |          |   |            | H | 0.8923  | -2.0815 | 0.5090  |      |      |      |      |
|     |          |   |            | H | 3.3629  | -2.1192 | 0.5067  |      |      |      |      |
|     |          |   |            | H | 4.6406  | -0.0496 | -0.0005 |      |      |      |      |
|     |          |   |            | H | 3.4182  | 2.0478  | -0.5233 |      |      |      |      |
|     |          |   |            | H | 0.9588  | 2.0778  | -0.5469 |      |      |      |      |
| CS4 | 0.213398 | A | 1472.69757 | C | -0.9561 | -0.2947 | 0.0345  | 43   | 81   | 88   | 109  |
|     |          | B | 3566.13354 | C | -1.5612 | 0.6486  | 0.8772  | 186  | 234  | 289  | 315  |
|     |          | C | 4668.95155 | C | -2.9444 | 0.8126  | 0.8874  | 325  | 416  | 427  | 474  |
|     |          |   |            | C | -3.7499 | 0.0389  | 0.0529  | 542  | 567  | 583  | 631  |
|     |          |   |            | C | -3.1617 | -0.9025 | -0.7898 | 635  | 666  | 715  | 733  |
|     |          |   |            | C | -1.7786 | -1.0696 | -0.7959 | 760  | 784  | 798  | 811  |
|     |          |   |            | C | 0.5188  | -0.5104 | 0.0432  | 859  | 890  | 935  | 937  |
|     |          |   |            | C | 2.8161  | 0.2439  | -0.1257 | 969  | 988  | 996  | 1004 |
|     |          |   |            | C | 3.2777  | -1.0396 | 0.1347  | 1013 | 1023 | 1031 | 1042 |



|     |          |   |            |   |         |         |         |      |      |      |      |
|-----|----------|---|------------|---|---------|---------|---------|------|------|------|------|
|     |          |   |            | C | 2.3650  | -2.0728 | 0.3425  | 1057 | 1079 | 1099 | 1126 |
|     |          |   |            | C | 1.0021  | -1.8033 | 0.2911  | 1181 | 1186 | 1203 | 1219 |
|     |          |   |            | H | -0.9432 | 1.2461  | 1.5374  | 1282 | 1292 | 1318 | 1323 |
|     |          |   |            | H | -3.3936 | 1.5418  | 1.5526  | 1340 | 1354 | 1449 | 1463 |
|     |          |   |            | H | -4.8263 | 0.1687  | 0.0597  | 1480 | 1506 | 1528 | 1597 |
|     |          |   |            | H | -3.7792 | -1.5056 | -1.4464 | 1614 | 1635 | 1640 | 1678 |
|     |          |   |            | H | -1.3264 | -1.7966 | -1.4616 | 3135 | 3154 | 3159 | 3162 |
|     |          |   |            | H | 3.5288  | 1.0334  | -0.3336 | 3166 | 3171 | 3176 | 3181 |
|     |          |   |            | H | 4.3436  | -1.2369 | 0.1587  | 3182 | 3190 | 3190 | 3218 |
|     |          |   |            | H | 2.7116  | -3.0804 | 0.5423  |      |      |      |      |
|     |          |   |            | H | 0.2896  | -2.6010 | 0.4695  |      |      |      |      |
|     |          |   |            | C | 1.4435  | 0.5400  | -0.1706 |      |      |      |      |
|     |          |   |            | C | 0.9887  | 1.9059  | -0.4957 |      |      |      |      |
|     |          |   |            | H | 0.0160  | 1.9768  | -0.9731 |      |      |      |      |
|     |          |   |            | C | 1.6583  | 3.0372  | -0.2539 |      |      |      |      |
|     |          |   |            | H | 2.6144  | 3.0510  | 0.2587  |      |      |      |      |
|     |          |   |            | H | 1.2556  | 3.9968  | -0.5556 |      |      |      |      |
| CS5 | 0.200103 | A | 1338.50498 | C | -0.8151 | -0.3351 | 0.0303  | 42   | 81   | 90   | 121  |
|     |          | B | 3546.31403 | C | -1.5988 | -0.9803 | -0.9044 | 192  | 212  | 272  | 298  |
|     |          | C | 4390.93571 | C | -2.9717 | -1.0319 | -0.9363 | 316  | 345  | 415  | 439  |
|     |          |   |            | C | -3.6485 | -0.3750 | 0.1001  | 470  | 495  | 535  | 559  |
|     |          |   |            | C | -2.9201 | 0.2858  | 1.0915  | 607  | 622  | 631  | 682  |
|     |          |   |            | C | -1.5282 | 0.3090  | 1.0614  | 708  | 737  | 742  | 760  |
|     |          |   |            | C | 0.6762  | -0.3886 | 0.0010  | 765  | 832  | 858  | 870  |
|     |          |   |            | C | 2.8956  | 0.5698  | 0.1038  | 947  | 958  | 965  | 984  |
|     |          |   |            | C | 3.4694  | -0.6951 | 0.1346  | 985  | 988  | 1011 | 1045 |
|     |          |   |            | C | 2.6503  | -1.8198 | 0.0789  | 1060 | 1090 | 1117 | 1131 |
|     |          |   |            | C | 1.2700  | -1.6575 | 0.0195  | 1174 | 1175 | 1220 | 1237 |
|     |          |   |            | H | -3.5130 | -1.5540 | -1.7178 | 1255 | 1309 | 1316 | 1318 |
|     |          |   |            | H | -4.7328 | -0.3869 | 0.1307  | 1392 | 1430 | 1434 | 1455 |
|     |          |   |            | H | -3.4433 | 0.7851  | 1.8993  | 1468 | 1493 | 1559 | 1565 |
|     |          |   |            | H | -0.9754 | 0.8265  | 1.8380  | 1600 | 1625 | 3092 | 3117 |
|     |          |   |            | H | 3.5353  | 1.4460  | 0.1273  | 3158 | 3161 | 3165 | 3170 |
|     |          |   |            | H | 4.5465  | -0.8007 | 0.1971  | 3175 | 3176 | 3178 | 3186 |
|     |          |   |            | H | 3.0786  | -2.8155 | 0.0987  | 3190 |      |      |      |
|     |          |   |            | H | 0.6249  | -2.5288 | 0.0114  |      |      |      |      |
|     |          |   |            | C | 1.5057  | 0.7582  | 0.0088  |      |      |      |      |
|     |          |   |            | C | 1.0429  | 2.1562  | -0.1213 |      |      |      |      |
|     |          |   |            | H | 1.7059  | 2.8850  | 0.3411  |      |      |      |      |
|     |          |   |            | C | -0.0133 | 2.6188  | -0.7951 |      |      |      |      |
|     |          |   |            | H | -0.7077 | 1.9717  | -1.3156 |      |      |      |      |
|     |          |   |            | H | -0.2053 | 3.6845  | -0.8475 |      |      |      |      |
| CS6 | 0.202383 | A | 1161.92643 | C | -3.5803 | -0.3363 | -0.0001 | 31   | 90   | 170  | 221  |
|     |          | B | 3315.31804 | C | -2.8736 | 0.8461  | -0.0001 | 249  | 276  | 396  | 426  |

|     |          |   |            |            |         |         |         |         |      |      |      |      |
|-----|----------|---|------------|------------|---------|---------|---------|---------|------|------|------|------|
|     |          |   | C          | 4466.38581 | C       | -1.4465 | 0.8610  | -0.0001 | 432  | 448  | 495  | 498  |
|     |          |   |            |            | C       | -0.7436 | -0.3951 | 0.0000  | 548  | 563  | 630  | 672  |
|     |          |   |            |            | C       | -1.4972 | -1.5728 | 0.0001  | 696  | 713  | 717  | 729  |
|     |          |   |            |            | C       | -2.8902 | -1.5589 | 0.0001  | 761  | 782  | 818  | 850  |
|     |          |   |            |            | C       | -0.7510 | 2.0730  | -0.0001 | 863  | 864  | 927  | 940  |
|     |          |   |            |            | C       | 0.7341  | -0.3920 | 0.0000  | 962  | 974  | 987  | 1007 |
|     |          |   |            |            | C       | 1.4445  | 0.8270  | 0.0001  | 1041 | 1060 | 1074 | 1113 |
|     |          |   |            |            | C       | 0.7330  | 2.1612  | 0.0002  | 1153 | 1175 | 1188 | 1197 |
|     |          |   |            |            | C       | 2.8430  | 0.8164  | 0.0000  | 1203 | 1217 | 1264 | 1297 |
|     |          |   |            |            | H       | 3.3740  | 1.7639  | 0.0000  | 1302 | 1330 | 1338 | 1375 |
|     |          |   |            |            | C       | 3.5600  | -0.3725 | -0.0001 | 1431 | 1447 | 1458 | 1483 |
|     |          |   |            |            | C       | 2.8666  | -1.5839 | -0.0001 | 1499 | 1533 | 1564 | 1603 |
|     |          |   |            |            | C       | 1.4802  | -1.5877 | -0.0001 | 1611 | 1642 | 2945 | 2947 |
|     |          |   |            |            | H       | -1.3140 | 3.0008  | -0.0002 | 3150 | 3157 | 3161 | 3168 |
|     |          |   |            |            | H       | -4.6645 | -0.3235 | -0.0001 | 3172 | 3182 | 3185 | 3194 |
|     |          |   |            |            | H       | -3.3969 | 1.7966  | -0.0002 | 3207 |      |      |      |
|     |          |   |            |            | H       | -0.9993 | -2.5338 | 0.0002  |      |      |      |      |
|     |          |   |            |            | H       | -3.4373 | -2.4944 | 0.0002  |      |      |      |      |
|     |          |   |            |            | H       | 1.0703  | 2.7503  | -0.8681 |      |      |      |      |
|     |          |   |            |            | H       | 4.6439  | -0.3580 | -0.0001 |      |      |      |      |
|     |          |   |            |            | H       | 3.4074  | -2.5236 | -0.0001 |      |      |      |      |
|     |          |   |            |            | H       | 0.9704  | -2.5421 | -0.0001 |      |      |      |      |
|     |          |   |            |            | H       | 1.0700  | 2.7499  | 0.8689  |      |      |      |      |
| CS7 | 0.193561 | A | 1115.17950 | C          | 3.5569  | -0.2969 | 0.0000  | 95      | 100  | 227  | 242  |      |
|     |          | B | 3272.40099 | C          | 2.8347  | 0.8773  | -0.0001 | 248     | 400  | 411  | 436  |      |
|     |          | C | 4387.58048 | C          | 1.4214  | 0.8653  | 0.0000  | 446     | 505  | 507  | 542  |      |
|     |          |   |            | C          | 0.7283  | -0.3792 | 0.0000  | 556     | 599  | 632  | 722  |      |
|     |          |   |            | C          | 1.4979  | -1.5646 | 0.0001  | 725     | 726  | 746  | 766  |      |
|     |          |   |            | C          | 2.8783  | -1.5281 | 0.0001  | 798     | 826  | 842  | 871  |      |
|     |          |   |            | C          | 0.6786  | 2.0921  | 0.0000  | 879     | 887  | 955  | 966  |      |
|     |          |   |            | C          | -0.7283 | -0.3792 | 0.0000  | 980     | 991  | 991  | 1016 |      |
|     |          |   |            | C          | -1.4214 | 0.8653  | 0.0000  | 1059    | 1060 | 1114 | 1164 |      |
|     |          |   |            | C          | -0.6786 | 2.0921  | 0.0000  | 1173    | 1185 | 1188 | 1224 |      |
|     |          |   |            | C          | -2.8347 | 0.8773  | 0.0000  | 1241    | 1266 | 1303 | 1324 |      |
|     |          |   |            | H          | -3.3464 | 1.8342  | 0.0001  | 1368    | 1374 | 1443 | 1449 |      |
|     |          |   |            | C          | -3.5569 | -0.2969 | 0.0000  | 1469    | 1489 | 1533 | 1560 |      |
|     |          |   |            | C          | -2.8783 | -1.5281 | -0.0001 | 1606    | 1640 | 1652 | 1657 |      |
|     |          |   |            | C          | -1.4979 | -1.5646 | -0.0001 | 3155    | 3159 | 3160 | 3169 |      |
|     |          |   |            | H          | 1.2288  | 3.0273  | 0.0000  | 3170    | 3175 | 3183 | 3186 |      |
|     |          |   |            | H          | 4.6407  | -0.2733 | -0.0001 | 3193    | 3206 |      |      |      |
|     |          |   |            | H          | 3.3464  | 1.8342  | -0.0001 |         |      |      |      |      |
|     |          |   |            | H          | 1.0055  | -2.5284 | 0.0002  |         |      |      |      |      |
|     |          |   |            | H          | 3.4406  | -2.4551 | 0.0001  |         |      |      |      |      |
|     |          |   |            | H          | -1.2288 | 3.0273  | 0.0001  |         |      |      |      |      |

|     |          |   |            |   |         |         |         |      |      |      |      |
|-----|----------|---|------------|---|---------|---------|---------|------|------|------|------|
|     |          |   |            | H | -4.6407 | -0.2733 | 0.0000  |      |      |      |      |
|     |          |   |            | H | -3.4406 | -2.4551 | -0.0001 |      |      |      |      |
|     |          |   |            | H | -1.0055 | -2.5284 | -0.0001 |      |      |      |      |
| CS8 | 0.133723 | A | 573.07843  | C | -2.3959 | 0.7952  | 0.0000  | 174  | 190  | 368  | 386  |
|     |          | B | 1414.98779 | C | -1.2358 | 1.4938  | 0.0000  | 471  | 486  | 510  | 520  |
|     |          | C | 1988.06621 | C | -0.0174 | 0.7449  | 0.0000  | 607  | 627  | 744  | 753  |
|     |          |   |            | C | -0.0869 | -0.6867 | 0.0000  | 766  | 792  | 805  | 845  |
|     |          |   |            | C | -1.3560 | -1.3274 | 0.0000  | 884  | 935  | 956  | 974  |
|     |          |   |            | C | -2.5256 | -0.5934 | 0.0000  | 995  | 1038 | 1048 | 1140 |
|     |          |   |            | H | 1.3050  | 2.4560  | 0.0000  | 1160 | 1172 | 1207 | 1249 |
|     |          |   |            | H | -1.2023 | 2.5785  | 0.0000  | 1276 | 1333 | 1384 | 1393 |
|     |          |   |            | C | 1.2553  | 1.3722  | 0.0000  | 1455 | 1466 | 1527 | 1588 |
|     |          |   |            | C | 1.1250  | -1.4271 | 0.0000  | 1617 | 1652 | 3155 | 3159 |
|     |          |   |            | H | -1.3961 | -2.4125 | 0.0000  | 3160 | 3164 | 3176 | 3180 |
|     |          |   |            | C | 2.3429  | -0.7903 | 0.0000  | 3188 |      |      |      |
|     |          |   |            | C | 2.4078  | 0.6227  | 0.0000  |      |      |      |      |
|     |          |   |            | H | 1.0741  | -2.5110 | 0.0000  |      |      |      |      |
|     |          |   |            | H | 3.2594  | -1.3693 | 0.0000  |      |      |      |      |
|     |          |   |            | H | 3.3742  | 1.1146  | 0.0000  |      |      |      |      |
|     |          |   |            | H | -3.4944 | -1.0797 | 0.0000  |      |      |      |      |
| CS9 | 0.198321 | A | 1126.38614 | C | -0.8745 | 0.9515  | -0.0716 | 31   | 49   | 102  | 150  |
|     |          | B | 5029.65219 | C | -0.2940 | -0.3023 | -0.1278 | 182  | 217  | 224  | 318  |
|     |          | C | 6053.80906 | C | 1.1086  | -0.4726 | -0.0621 | 349  | 410  | 419  | 482  |
|     |          |   |            | C | 1.9472  | 0.6811  | 0.0658  | 504  | 524  | 529  | 544  |
|     |          |   |            | C | 1.3335  | 1.9588  | 0.1221  | 581  | 641  | 649  | 729  |
|     |          |   |            | C | -0.0310 | 2.0897  | 0.0559  | 750  | 754  | 776  | 779  |
|     |          |   |            | H | 1.0833  | -2.6314 | -0.2151 | 809  | 842  | 874  | 908  |
|     |          |   |            | H | -0.9236 | -1.1812 | -0.2237 | 917  | 935  | 936  | 966  |
|     |          |   |            | C | 1.7176  | -1.7564 | -0.1185 | 978  | 979  | 993  | 1039 |
|     |          |   |            | C | 3.3538  | 0.5058  | 0.1317  | 1083 | 1147 | 1172 | 1176 |
|     |          |   |            | H | 1.9611  | 2.8387  | 0.2190  | 1184 | 1190 | 1226 | 1263 |
|     |          |   |            | C | 3.9104  | -0.7496 | 0.0741  | 1288 | 1315 | 1383 | 1393 |
|     |          |   |            | C | 3.0829  | -1.8917 | -0.0523 | 1402 | 1416 | 1469 | 1489 |
|     |          |   |            | H | 3.9861  | 1.3825  | 0.2287  | 1498 | 1542 | 1604 | 1637 |
|     |          |   |            | H | 4.9866  | -0.8707 | 0.1252  | 1663 | 1884 | 3059 | 3096 |
|     |          |   |            | H | 3.5338  | -2.8768 | -0.0968 | 3149 | 3156 | 3157 | 3161 |
|     |          |   |            | C | -2.3375 | 1.1582  | -0.1389 | 3164 | 3174 | 3175 | 3187 |
|     |          |   |            | H | -2.6609 | 2.2005  | -0.0779 | 3250 |      |      |      |
|     |          |   |            | C | -3.2589 | 0.2378  | -0.2598 |      |      |      |      |
|     |          |   |            | C | -4.2242 | -0.6941 | -0.3953 |      |      |      |      |
|     |          |   |            | H | -4.5089 | -0.9564 | -1.4150 |      |      |      |      |
|     |          |   |            | C | -4.8815 | -1.3447 | 0.6487  |      |      |      |      |
|     |          |   |            | H | -4.6444 | -1.1281 | 1.6825  |      |      |      |      |
|     |          |   |            | H | -5.6456 | -2.0821 | 0.4414  |      |      |      |      |

|      |          |   |            |   |         |         |         |      |      |      |      |
|------|----------|---|------------|---|---------|---------|---------|------|------|------|------|
|      |          |   |            | H | -0.4824 | 3.0754  | 0.1007  |      |      |      |      |
| CS10 | 0.199581 | A | 836.22404  | C | -0.9095 | 0.4789  | -0.0686 | 49   | 55   | 86   | 146  |
|      |          | B | 5700.43574 | C | -0.0424 | -0.5785 | -0.0281 | 178  | 193  | 211  | 303  |
|      |          | C | 6505.05449 | C | 1.3494  | -0.5437 | 0.0049  | 308  | 411  | 435  | 473  |
|      |          |   |            | C | 1.9451  | 0.7691  | -0.0072 | 497  | 516  | 522  | 580  |
|      |          |   |            | C | 1.0878  | 1.9013  | -0.0495 | 626  | 640  | 665  | 750  |
|      |          |   |            | C | -0.2775 | 1.7676  | -0.0789 | 759  | 768  | 777  | 816  |
|      |          |   |            | H | 1.7351  | -2.6716 | 0.0600  | 867  | 891  | 924  | 934  |
|      |          |   |            | H | -2.5236 | -1.7063 | -0.2578 | 956  | 969  | 970  | 990  |
|      |          |   |            | C | 2.1913  | -1.6888 | 0.0501  | 991  | 1003 | 1027 | 1037 |
|      |          |   |            | C | 3.3589  | 0.8693  | 0.0246  | 1081 | 1142 | 1167 | 1172 |
|      |          |   |            | H | 1.5331  | 2.8904  | -0.0579 | 1201 | 1235 | 1263 | 1313 |
|      |          |   |            | C | 4.1459  | -0.2575 | 0.0674  | 1330 | 1349 | 1360 | 1365 |
|      |          |   |            | C | 3.5568  | -1.5451 | 0.0808  | 1390 | 1444 | 1452 | 1490 |
|      |          |   |            | H | 3.8122  | 1.8552  | 0.0145  | 1516 | 1574 | 1623 | 1644 |
|      |          |   |            | H | 5.2257  | -0.1638 | 0.0912  | 1663 | 1687 | 3123 | 3133 |
|      |          |   |            | H | 4.1924  | -2.4227 | 0.1153  | 3140 | 3144 | 3152 | 3158 |
|      |          |   |            | C | -2.3670 | 0.3750  | -0.0985 | 3169 | 3175 | 3182 | 3192 |
|      |          |   |            | H | -2.9022 | 1.3211  | -0.0798 | 3220 |      |      |      |
|      |          |   |            | C | -3.0711 | -0.7705 | -0.1687 |      |      |      |      |
|      |          |   |            | C | -4.5284 | -0.8759 | -0.1714 |      |      |      |      |
|      |          |   |            | H | -4.9303 | -1.7629 | -0.6570 |      |      |      |      |
|      |          |   |            | C | -5.3913 | -0.0141 | 0.3826  |      |      |      |      |
|      |          |   |            | H | -5.0588 | 0.8588  | 0.9343  |      |      |      |      |
|      |          |   |            | H | -6.4612 | -0.1697 | 0.3119  |      |      |      |      |
|      |          |   |            | H | -0.9097 | 2.6499  | -0.1102 |      |      |      |      |
| CS11 | 0.199755 | A | 1256.98257 | C | 1.1471  | 0.9793  | 0.0733  | 35   | 69   | 92   | 127  |
|      |          | B | 3925.35874 | C | 0.4684  | -0.2078 | 0.0620  | 180  | 188  | 244  | 322  |
|      |          | C | 5150.97391 | C | -0.9151 | -0.3962 | 0.0225  | 384  | 418  | 427  | 467  |
|      |          |   |            | C | -1.7183 | 0.7974  | -0.0182 | 500  | 519  | 524  | 594  |
|      |          |   |            | C | -1.0580 | 2.0569  | -0.0093 | 623  | 666  | 697  | 748  |
|      |          |   |            | C | 0.3086  | 2.1480  | 0.0336  | 761  | 772  | 783  | 800  |
|      |          |   |            | H | -0.9449 | -2.5583 | 0.0415  | 831  | 871  | 895  | 931  |
|      |          |   |            | H | 4.6030  | 0.7346  | -0.1269 | 938  | 958  | 971  | 990  |
|      |          |   |            | C | -1.5568 | -1.6643 | 0.0181  | 992  | 999  | 1021 | 1038 |
|      |          |   |            | C | -3.1284 | 0.6642  | -0.0622 | 1089 | 1139 | 1161 | 1173 |
|      |          |   |            | H | -1.6590 | 2.9597  | -0.0355 | 1194 | 1236 | 1262 | 1276 |
|      |          |   |            | C | -3.7199 | -0.5779 | -0.0626 | 1334 | 1352 | 1362 | 1398 |
|      |          |   |            | C | -2.9277 | -1.7499 | -0.0215 | 1439 | 1445 | 1471 | 1492 |
|      |          |   |            | H | -3.7374 | 1.5618  | -0.0968 | 1515 | 1576 | 1617 | 1642 |
|      |          |   |            | H | -4.8001 | -0.6638 | -0.0968 | 1663 | 1676 | 3111 | 3123 |
|      |          |   |            | H | -3.4096 | -2.7210 | -0.0251 | 3139 | 3144 | 3151 | 3157 |
|      |          |   |            | C | 2.5971  | 1.1675  | 0.1014  | 3169 | 3173 | 3181 | 3191 |
|      |          |   |            | H | 2.8923  | 2.2068  | 0.2217  | 3224 |      |      |      |

|      |          |   |            |   |         |         |         |      |      |      |      |
|------|----------|---|------------|---|---------|---------|---------|------|------|------|------|
|      |          |   |            | C | 3.6103  | 0.2913  | -0.0806 |      |      |      |      |
|      |          |   |            | C | 3.5960  | -1.1503 | -0.3045 |      |      |      |      |
|      |          |   |            | H | 4.3756  | -1.5077 | -0.9760 |      |      |      |      |
|      |          |   |            | C | 2.7901  | -2.0621 | 0.2558  |      |      |      |      |
|      |          |   |            | H | 2.0479  | -1.7988 | 0.9987  |      |      |      |      |
|      |          |   |            | H | 2.8854  | -3.1132 | 0.0069  |      |      |      |      |
|      |          |   |            | H | 0.7865  | 3.1231  | 0.0413  |      |      |      |      |
| CS12 | 0.202323 | A | 1151.03759 | C | 1.3721  | 0.9092  | 0.0000  | 84   | 116  | 164  | 221  |
|      |          | B | 3303.34178 | C | 0.6949  | -0.3216 | 0.0000  | 231  | 294  | 404  | 417  |
|      |          | C | 4443.54346 | C | -0.7319 | -0.3484 | 0.0000  | 445  | 472  | 493  | 530  |
|      |          |   |            | C | -1.4641 | 0.8840  | 0.0000  | 539  | 542  | 604  | 653  |
|      |          |   |            | C | -0.7455 | 2.1143  | 0.0000  | 670  | 702  | 715  | 747  |
|      |          |   |            | C | 0.6174  | 2.1254  | 0.0000  | 765  | 789  | 832  | 836  |
|      |          |   |            | H | -0.9542 | -2.5097 | 0.0000  | 860  | 866  | 937  | 953  |
|      |          |   |            | H | 4.6477  | -0.1569 | -0.0001 | 959  | 967  | 978  | 988  |
|      |          |   |            | C | -1.4760 | -1.5612 | 0.0000  | 1003 | 1051 | 1071 | 1121 |
|      |          |   |            | C | -2.8777 | 0.8551  | 0.0000  | 1167 | 1174 | 1181 | 1200 |
|      |          |   |            | H | -1.3037 | 3.0448  | 0.0000  | 1204 | 1228 | 1235 | 1287 |
|      |          |   |            | C | -3.5654 | -0.3386 | 0.0000  | 1314 | 1344 | 1382 | 1406 |
|      |          |   |            | C | -2.8532 | -1.5560 | 0.0000  | 1415 | 1440 | 1444 | 1458 |
|      |          |   |            | H | -3.4166 | 1.7971  | 0.0000  | 1487 | 1542 | 1564 | 1588 |
|      |          |   |            | H | -4.6494 | -0.3456 | 0.0000  | 1633 | 1645 | 2936 | 2940 |
|      |          |   |            | H | -3.3952 | -2.4952 | 0.0000  | 3154 | 3155 | 3158 | 3168 |
|      |          |   |            | C | 2.8009  | 0.9543  | 0.0000  | 3171 | 3174 | 3184 | 3184 |
|      |          |   |            | H | 3.2925  | 1.9202  | 0.0000  | 3196 |      |      |      |
|      |          |   |            | C | 3.5649  | -0.2274 | 0.0000  |      |      |      |      |
|      |          |   |            | C | 2.9669  | -1.4559 | 0.0001  |      |      |      |      |
|      |          |   |            | H | 3.5671  | -2.3594 | 0.0002  |      |      |      |      |
|      |          |   |            | C | 1.4786  | -1.6170 | 0.0000  |      |      |      |      |
|      |          |   |            | H | 1.1816  | -2.2295 | 0.8676  |      |      |      |      |
|      |          |   |            | H | 1.1816  | -2.2295 | -0.8676 |      |      |      |      |
|      |          |   |            | H | 1.1572  | 3.0666  | 0.0000  |      |      |      |      |
| CS13 | 0.180474 | A | 1093.99344 | C | 3.5598  | -0.3684 | 0.0000  | 99   | 115  | 221  | 223  |
|      |          | B | 3259.66075 | C | 2.8557  | 0.8188  | 0.0000  | 247  | 408  | 409  | 446  |
|      |          | C | 4353.65419 | C | 1.4412  | 0.8411  | 0.0000  | 450  | 494  | 499  | 554  |
|      |          |   |            | C | 0.7196  | -0.3940 | 0.0000  | 556  | 586  | 628  | 705  |
|      |          |   |            | C | 1.5076  | -1.5413 | 0.0000  | 720  | 724  | 741  | 769  |
|      |          |   |            | C | 2.8667  | -1.6041 | 0.0000  | 794  | 826  | 835  | 880  |
|      |          |   |            | C | 0.7007  | 2.0700  | 0.0000  | 887  | 888  | 965  | 968  |
|      |          |   |            | C | -0.7284 | -0.3893 | 0.0000  | 983  | 995  | 1011 | 1049 |
|      |          |   |            | C | -1.4141 | 0.8555  | 0.0000  | 1064 | 1098 | 1162 | 1171 |
|      |          |   |            | C | -0.6586 | 2.0759  | 0.0000  | 1179 | 1189 | 1229 | 1242 |
|      |          |   |            | C | -2.8273 | 0.8611  | 0.0000  | 1281 | 1313 | 1354 | 1367 |
|      |          |   |            | H | -3.3469 | 1.8138  | 0.0000  | 1423 | 1430 | 1448 | 1474 |

|      |          |   |            |   |         |         |         |      |      |      |      |
|------|----------|---|------------|---|---------|---------|---------|------|------|------|------|
|      |          |   |            | C | -3.5405 | -0.3198 | 0.0000  | 1512 | 1531 | 1583 | 1633 |
|      |          |   |            | C | -2.8599 | -1.5517 | 0.0000  | 1647 | 1652 | 3155 | 3159 |
|      |          |   |            | C | -1.4798 | -1.5835 | 0.0000  | 3159 | 3166 | 3169 | 3174 |
|      |          |   |            | H | 1.2535  | 3.0038  | 0.0000  | 3177 | 3182 | 3188 |      |
|      |          |   |            | H | 4.6445  | -0.3634 | 0.0000  |      |      |      |      |
|      |          |   |            | H | 3.3892  | 1.7634  | 0.0000  |      |      |      |      |
|      |          |   |            | H | 3.4063  | -2.5447 | 0.0000  |      |      |      |      |
|      |          |   |            | H | -1.2004 | 3.0160  | 0.0000  |      |      |      |      |
|      |          |   |            | H | -4.6245 | -0.3011 | 0.0000  |      |      |      |      |
|      |          |   |            | H | -3.4223 | -2.4787 | 0.0000  |      |      |      |      |
|      |          |   |            | H | -0.9541 | -2.5319 | 0.0000  |      |      |      |      |
| CS14 | 0.226429 | A | 2122.34389 | C | -3.6359 | 0.8337  | 0.0397  | 58   | 97   | 130  | 155  |
|      |          | B | 3554.41093 | C | -3.2415 | -0.4781 | -0.1145 | 226  | 240  | 276  | 312  |
|      |          | C | 5616.70353 | C | -1.8763 | -0.8396 | -0.0992 | 338  | 403  | 416  | 476  |
|      |          |   |            | C | -0.8705 | 0.1684  | 0.0230  | 500  | 509  | 514  | 541  |
|      |          |   |            | C | -1.3175 | 1.4940  | 0.2443  | 569  | 587  | 626  | 682  |
|      |          |   |            | C | -2.6606 | 1.8210  | 0.2474  | 703  | 727  | 742  | 758  |
|      |          |   |            | C | -1.5033 | -2.2215 | -0.1417 | 784  | 799  | 812  | 846  |
|      |          |   |            | C | 0.5386  | -0.2210 | -0.0183 | 855  | 883  | 923  | 939  |
|      |          |   |            | C | 0.8444  | -1.6158 | 0.0489  | 969  | 979  | 985  | 988  |
|      |          |   |            | C | -0.2054 | -2.5907 | -0.0225 | 996  | 1011 | 1045 | 1055 |
|      |          |   |            | C | 2.1813  | -2.0538 | 0.1546  | 1071 | 1120 | 1153 | 1174 |
|      |          |   |            | H | 2.3763  | -3.1189 | 0.2203  | 1185 | 1196 | 1225 | 1241 |
|      |          |   |            | C | 3.2192  | -1.1494 | 0.1554  | 1254 | 1289 | 1319 | 1325 |
|      |          |   |            | C | 2.9404  | 0.2111  | -0.0140 | 1345 | 1362 | 1414 | 1441 |
|      |          |   |            | C | 1.6374  | 0.6948  | -0.1197 | 1451 | 1468 | 1480 | 1528 |
|      |          |   |            | H | -2.2865 | -2.9672 | -0.2278 | 1556 | 1602 | 1624 | 1645 |
|      |          |   |            | H | -4.6878 | 1.0959  | 0.0317  | 1659 | 1674 | 3130 | 3138 |
|      |          |   |            | H | -3.9823 | -1.2627 | -0.2289 | 3156 | 3159 | 3163 | 3170 |
|      |          |   |            | H | -0.6011 | 2.2724  | 0.4555  | 3176 | 3178 | 3185 | 3191 |
|      |          |   |            | H | -2.9588 | 2.8479  | 0.4269  | 3217 | 3230 |      |      |
|      |          |   |            | H | 0.0706  | -3.6397 | -0.0009 |      |      |      |      |
|      |          |   |            | H | 4.2466  | -1.4861 | 0.2339  |      |      |      |      |
|      |          |   |            | H | 3.7596  | 0.9112  | -0.1242 |      |      |      |      |
|      |          |   |            | C | 1.4827  | 2.1265  | -0.4623 |      |      |      |      |
|      |          |   |            | H | 0.7597  | 2.3503  | -1.2425 |      |      |      |      |
|      |          |   |            | C | 2.1899  | 3.1322  | 0.0601  |      |      |      |      |
|      |          |   |            | H | 2.8983  | 2.9786  | 0.8673  |      |      |      |      |
|      |          |   |            | H | 2.0675  | 4.1477  | -0.2985 |      |      |      |      |
| CS15 | 0.212851 | A | 2106.73692 | C | 3.2744  | -0.9885 | 0.0086  | 60   | 82   | 109  | 156  |
|      |          | B | 3457.49098 | C | 2.2894  | -1.9515 | 0.0522  | 225  | 231  | 246  | 301  |
|      |          | C | 5520.62916 | C | 0.9269  | -1.5861 | 0.0137  | 345  | 405  | 421  | 467  |
|      |          |   |            | C | 0.5639  | -0.2113 | -0.0662 | 491  | 503  | 516  | 542  |
|      |          |   |            | C | 1.5941  | 0.7733  | -0.1430 | 565  | 575  | 624  | 675  |

|      |          |   |            |   |         |         |         |      |      |      |      |
|------|----------|---|------------|---|---------|---------|---------|------|------|------|------|
|      |          |   |            | C | 2.9235  | 0.3646  | -0.0992 | 688  | 720  | 724  | 754  |
|      |          |   |            | C | -0.0952 | -2.5929 | 0.0581  | 773  | 799  | 809  | 841  |
|      |          |   |            | C | -0.8462 | 0.1289  | -0.0385 | 849  | 888  | 923  | 940  |
|      |          |   |            | C | -1.8393 | -0.9041 | 0.0037  | 967  | 977  | 981  | 987  |
|      |          |   |            | C | -1.4142 | -2.2717 | 0.0415  | 1005 | 1011 | 1054 | 1065 |
|      |          |   |            | C | -3.2090 | -0.5546 | 0.0277  | 1107 | 1143 | 1172 | 1187 |
|      |          |   |            | H | -3.9449 | -1.3511 | 0.0556  | 1192 | 1228 | 1250 | 1273 |
|      |          |   |            | C | -3.6210 | 0.7634  | 0.0250  | 1300 | 1321 | 1344 | 1355 |
|      |          |   |            | C | -2.6602 | 1.8013  | 0.0028  | 1407 | 1426 | 1443 | 1448 |
|      |          |   |            | C | -1.3510 | 1.4261  | -0.0246 | 1471 | 1505 | 1523 | 1585 |
|      |          |   |            | H | 0.2143  | -3.6317 | 0.1054  | 1623 | 1641 | 1650 | 1666 |
|      |          |   |            | H | 4.3205  | -1.2723 | 0.0360  | 3128 | 3134 | 3156 | 3157 |
|      |          |   |            | H | 2.5486  | -3.0031 | 0.1147  | 3161 | 3167 | 3174 | 3176 |
|      |          |   |            | H | 3.7014  | 1.1142  | -0.1846 | 3180 | 3189 | 3218 |      |
|      |          |   |            | H | -2.1715 | -3.0482 | 0.0716  |      |      |      |      |
|      |          |   |            | H | -4.6776 | 1.0085  | 0.0472  |      |      |      |      |
|      |          |   |            | H | -2.9650 | 2.8421  | 0.0128  |      |      |      |      |
|      |          |   |            | C | 1.2930  | 2.2096  | -0.3171 |      |      |      |      |
|      |          |   |            | H | 0.5734  | 2.4609  | -1.0922 |      |      |      |      |
|      |          |   |            | C | 1.8693  | 3.1998  | 0.3715  |      |      |      |      |
|      |          |   |            | H | 2.5717  | 3.0041  | 1.1751  |      |      |      |      |
|      |          |   |            | H | 1.6381  | 4.2376  | 0.1614  |      |      |      |      |
| CS16 | 0.214991 | A | 1832.19022 | C | 3.5444  | -0.0301 | -0.0004 | 63   | 120  | 184  | 211  |
|      |          | B | 3293.16172 | C | 2.8647  | 1.1818  | -0.0003 | 238  | 288  | 352  | 402  |
|      |          | C | 5114.48660 | C | 1.4465  | 1.2287  | -0.0001 | 436  | 448  | 489  | 499  |
|      |          |   |            | C | 0.7215  | -0.0209 | -0.0001 | 507  | 528  | 549  | 561  |
|      |          |   |            | C | 1.4311  | -1.2441 | -0.0002 | 582  | 625  | 685  | 685  |
|      |          |   |            | C | 2.8473  | -1.2331 | -0.0003 | 713  | 732  | 758  | 769  |
|      |          |   |            | C | 0.7510  | 2.4377  | -0.0001 | 793  | 802  | 816  | 836  |
|      |          |   |            | C | -0.7170 | -0.0219 | 0.0001  | 871  | 899  | 937  | 947  |
|      |          |   |            | C | -1.4533 | 1.1910  | 0.0001  | 971  | 978  | 985  | 1002 |
|      |          |   |            | C | -0.7374 | 2.5258  | 0.0000  | 1048 | 1093 | 1109 | 1113 |
|      |          |   |            | C | -2.8381 | 1.1460  | 0.0003  | 1168 | 1188 | 1193 | 1197 |
|      |          |   |            | H | -3.4008 | 2.0748  | 0.0004  | 1210 | 1226 | 1256 | 1257 |
|      |          |   |            | C | -3.5273 | -0.0770 | 0.0004  | 1319 | 1339 | 1362 | 1379 |
|      |          |   |            | C | -2.8264 | -1.2661 | 0.0003  | 1415 | 1437 | 1439 | 1455 |
|      |          |   |            | C | -1.4165 | -1.2649 | 0.0002  | 1459 | 1477 | 1522 | 1537 |
|      |          |   |            | C | -0.6646 | -2.4848 | 0.0001  | 1584 | 1602 | 1636 | 1649 |
|      |          |   |            | C | 0.6950  | -2.4754 | -0.0001 | 2952 | 2953 | 3152 | 3155 |
|      |          |   |            | H | 1.2498  | -3.4079 | -0.0001 | 3157 | 3161 | 3163 | 3170 |
|      |          |   |            | H | -1.2069 | -3.4247 | 0.0001  | 3174 | 3183 | 3184 |      |
|      |          |   |            | H | 1.3112  | 3.3672  | -0.0001 |      |      |      |      |
|      |          |   |            | H | 4.6289  | -0.0366 | -0.0005 |      |      |      |      |
|      |          |   |            | H | 3.4166  | 2.1157  | -0.0003 |      |      |      |      |

|      |          |   |            |   |         |         |         |      |      |      |      |
|------|----------|---|------------|---|---------|---------|---------|------|------|------|------|
|      |          |   |            | H | 3.3819  | -2.1767 | -0.0004 |      |      |      |      |
|      |          |   |            | H | -1.0711 | 3.1154  | 0.8688  |      |      |      |      |
|      |          |   |            | H | -4.6116 | -0.0828 | 0.0005  |      |      |      |      |
|      |          |   |            | H | -3.3527 | -2.2148 | 0.0004  |      |      |      |      |
|      |          |   |            | H | -1.0712 | 3.1154  | -0.8687 |      |      |      |      |
| CS17 | 0.206163 | A | 1782.55145 | C | 3.5194  | 0.0000  | 0.0003  | 97   | 150  | 210  | 246  |
|      |          | B | 3244.15401 | C | 2.8296  | -1.2091 | 0.0003  | 260  | 358  | 402  | 411  |
|      |          | C | 5026.70546 | C | 1.4273  | -1.2343 | 0.0002  | 462  | 499  | 505  | 507  |
|      |          |   |            | C | 0.7128  | 0.0000  | 0.0001  | 507  | 538  | 553  | 581  |
|      |          |   |            | C | 1.4273  | 1.2343  | 0.0001  | 594  | 687  | 703  | 718  |
|      |          |   |            | C | 2.8296  | 1.2091  | 0.0003  | 748  | 752  | 766  | 809  |
|      |          |   |            | C | 0.6795  | -2.4612 | 0.0001  | 811  | 814  | 833  | 854  |
|      |          |   |            | C | -0.7128 | 0.0000  | -0.0001 | 902  | 916  | 974  | 979  |
|      |          |   |            | C | -1.4273 | -1.2343 | -0.0001 | 980  | 982  | 989  | 1014 |
|      |          |   |            | C | -0.6795 | -2.4612 | 0.0000  | 1089 | 1112 | 1125 | 1164 |
|      |          |   |            | C | -2.8296 | -1.2091 | -0.0003 | 1166 | 1197 | 1203 | 1230 |
|      |          |   |            | H | -3.3758 | -2.1460 | -0.0003 | 1261 | 1262 | 1266 | 1342 |
|      |          |   |            | C | -3.5194 | 0.0000  | -0.0004 | 1350 | 1399 | 1425 | 1432 |
|      |          |   |            | C | -2.8296 | 1.2091  | -0.0003 | 1456 | 1458 | 1481 | 1512 |
|      |          |   |            | C | -1.4273 | 1.2343  | -0.0002 | 1532 | 1592 | 1624 | 1632 |
|      |          |   |            | C | -0.6795 | 2.4612  | -0.0001 | 1642 | 1667 | 3161 | 3161 |
|      |          |   |            | C | 0.6795  | 2.4612  | 0.0001  | 3164 | 3164 | 3170 | 3172 |
|      |          |   |            | H | 1.2271  | 3.3974  | 0.0002  | 3180 | 3180 | 3188 | 3189 |
|      |          |   |            | H | -1.2271 | 3.3974  | -0.0001 |      |      |      |      |
|      |          |   |            | H | 1.2271  | -3.3974 | 0.0002  |      |      |      |      |
|      |          |   |            | H | 4.6031  | 0.0000  | 0.0004  |      |      |      |      |
|      |          |   |            | H | 3.3758  | -2.1460 | 0.0003  |      |      |      |      |
|      |          |   |            | H | 3.3758  | 2.1460  | 0.0004  |      |      |      |      |
|      |          |   |            | H | -1.2271 | -3.3974 | 0.0000  |      |      |      |      |
|      |          |   |            | H | -4.6031 | 0.0000  | -0.0005 |      |      |      |      |
|      |          |   |            | H | -3.3758 | 2.1460  | -0.0004 |      |      |      |      |
| CS18 | 0.142704 | A | 1175.87563 | C | -1.7281 | -1.9791 | 0.0001  | 103  | 138  | 176  | 207  |
|      |          | B | 1892.59436 | C | -0.4048 | -1.6894 | -0.0001 | 356  | 363  | 436  | 445  |
|      |          | C | 3068.46999 | C | -0.0351 | -0.3105 | 0.0000  | 479  | 490  | 551  | 568  |
|      |          |   |            | C | -1.0702 | 0.6798  | 0.0002  | 587  | 632  | 644  | 696  |
|      |          |   |            | C | -2.4325 | 0.2728  | 0.0003  | 701  | 744  | 768  | 791  |
|      |          |   |            | C | -2.7785 | -1.0634 | 0.0002  | 827  | 862  | 868  | 928  |
|      |          |   |            | H | 0.3656  | -2.4521 | -0.0002 | 960  | 987  | 1029 | 1053 |
|      |          |   |            | C | 1.3350  | 0.1175  | -0.0002 | 1094 | 1150 | 1191 | 1215 |
|      |          |   |            | C | -0.7142 | 2.0534  | 0.0002  | 1241 | 1277 | 1325 | 1355 |
|      |          |   |            | H | -3.2054 | 1.0352  | 0.0004  | 1386 | 1446 | 1471 | 1512 |
|      |          |   |            | H | -3.8163 | -1.3768 | 0.0003  | 1592 | 1612 | 1636 | 2195 |
|      |          |   |            | C | 0.6050  | 2.4394  | 0.0001  | 3157 | 3165 | 3177 | 3180 |
|      |          |   |            | C | 1.6291  | 1.4730  | -0.0001 | 3180 | 3194 | 3475 |      |



|       |          |   |            |   |         |         |         |      |      |      |      |
|-------|----------|---|------------|---|---------|---------|---------|------|------|------|------|
|       |          |   |            | H | -1.5037 | 2.7974  | 0.0004  |      |      |      |      |
|       |          |   |            | H | 0.8668  | 3.4912  | 0.0001  |      |      |      |      |
|       |          |   |            | H | 2.6664  | 1.7852  | -0.0002 |      |      |      |      |
|       |          |   |            | C | 2.3933  | -0.8388 | -0.0003 |      |      |      |      |
|       |          |   |            | C | 3.2911  | -1.6432 | -0.0005 |      |      |      |      |
|       |          |   |            | H | 4.0860  | -2.3483 | -0.0006 |      |      |      |      |
| <hr/> |          |   |            |   |         |         |         |      |      |      |      |
| CS19  | 0.207231 | A | 2107.56530 | C | -0.9778 | -1.3211 | -0.0987 | 24   | 45   | 86   | 115  |
|       |          | B | 5081.48293 | C | -0.3546 | -0.0853 | -0.1017 | 127  | 158  | 187  | 222  |
|       |          | C | 7076.44421 | C | 1.0507  | 0.0338  | -0.0244 | 230  | 312  | 340  | 386  |
|       |          |   |            | C | 1.8465  | -1.1533 | 0.0592  | 403  | 448  | 454  | 508  |
|       |          |   |            | C | 1.1887  | -2.4103 | 0.0606  | 517  | 528  | 551  | 580  |
|       |          |   |            | C | -0.1781 | -2.4928 | -0.0158 | 586  | 593  | 636  | 672  |
|       |          |   |            | H | -0.9517 | 0.8168  | -0.1637 | 695  | 712  | 734  | 751  |
|       |          |   |            | C | 1.7175  | 1.3087  | -0.0262 | 758  | 785  | 819  | 854  |
|       |          |   |            | C | 3.2578  | -1.0473 | 0.1381  | 872  | 912  | 925  | 927  |
|       |          |   |            | H | 1.7877  | -3.3128 | 0.1237  | 935  | 953  | 973  | 985  |
|       |          |   |            | H | -0.6634 | -3.4632 | -0.0133 | 1047 | 1082 | 1094 | 1175 |
|       |          |   |            | C | 3.8704  | 0.1834  | 0.1348  | 1179 | 1190 | 1199 | 1231 |
|       |          |   |            | C | 3.1005  | 1.3608  | 0.0525  | 1253 | 1289 | 1308 | 1351 |
|       |          |   |            | H | 3.8479  | -1.9555 | 0.2015  | 1389 | 1402 | 1419 | 1472 |
|       |          |   |            | H | 4.9500  | 0.2577  | 0.1951  | 1476 | 1489 | 1537 | 1603 |
|       |          |   |            | H | 3.5907  | 2.3267  | 0.0501  | 1626 | 1653 | 1883 | 2194 |
|       |          |   |            | C | 0.9691  | 2.5200  | -0.1085 | 3059 | 3098 | 3149 | 3158 |
|       |          |   |            | C | 0.3427  | 3.5477  | -0.1778 | 3163 | 3175 | 3180 | 3184 |
|       |          |   |            | H | -0.2071 | 4.4550  | -0.2380 | 3194 | 3251 | 3475 |      |
|       |          |   |            | C | -2.4465 | -1.4718 | -0.1788 |      |      |      |      |
|       |          |   |            | H | -2.8069 | -2.5036 | -0.1700 |      |      |      |      |
|       |          |   |            | C | -3.3335 | -0.5134 | -0.2549 |      |      |      |      |
|       |          |   |            | C | -4.2653 | 0.4569  | -0.3450 |      |      |      |      |
|       |          |   |            | H | -4.5349 | 0.7808  | -1.3509 |      |      |      |      |
|       |          |   |            | C | -4.9038 | 1.0757  | 0.7293  |      |      |      |      |
|       |          |   |            | H | -4.6778 | 0.7994  | 1.7512  |      |      |      |      |
|       |          |   |            | H | -5.6398 | 1.8500  | 0.5580  |      |      |      |      |
| <hr/> |          |   |            |   |         |         |         |      |      |      |      |
| CS20  | 0.208491 | A | 1952.88612 | C | 1.0036  | -1.1075 | 0.0000  | 33   | 61   | 83   | 112  |
|       |          | B | 5729.80452 | C | 0.2011  | 0.0019  | 0.0000  | 122  | 156  | 183  | 215  |
|       |          | C | 7682.69064 | C | -1.1883 | 0.0486  | 0.0000  | 244  | 290  | 319  | 372  |
|       |          |   |            | C | -1.8628 | -1.2232 | 0.0000  | 381  | 452  | 469  | 491  |
|       |          |   |            | C | -1.0743 | -2.4055 | 0.0000  | 520  | 535  | 554  | 580  |
|       |          |   |            | C | 0.2967  | -2.3557 | 0.0000  | 589  | 632  | 644  | 684  |
|       |          |   |            | C | -1.9619 | 1.2574  | 0.0000  | 694  | 712  | 747  | 756  |
|       |          |   |            | C | -3.2788 | -1.2446 | 0.0000  | 781  | 831  | 870  | 895  |
|       |          |   |            | H | -1.5796 | -3.3652 | 0.0000  | 924  | 928  | 959  | 960  |
|       |          |   |            | H | 0.8742  | -3.2752 | 0.0000  | 965  | 975  | 983  | 1038 |
|       |          |   |            | C | -4.0002 | -0.0725 | 0.0000  | 1041 | 1088 | 1158 | 1171 |

|      |          |   |            |   |         |         |         |      |      |      |      |
|------|----------|---|------------|---|---------|---------|---------|------|------|------|------|
|      |          |   |            | C | -3.3450 | 1.1757  | 0.0000  | 1191 | 1221 | 1244 | 1259 |
|      |          |   |            | H | -3.7879 | -2.2027 | 0.0000  | 1293 | 1314 | 1324 | 1345 |
|      |          |   |            | H | -5.0836 | -0.1012 | 0.0000  | 1358 | 1394 | 1443 | 1455 |
|      |          |   |            | H | -3.9257 | 2.0900  | 0.0000  | 1468 | 1510 | 1577 | 1621 |
|      |          |   |            | C | -1.3069 | 2.5230  | 0.0000  | 1628 | 1651 | 1687 | 2197 |
|      |          |   |            | C | -0.7596 | 3.5969  | 0.0000  | 3125 | 3132 | 3136 | 3141 |
|      |          |   |            | H | -0.2759 | 4.5428  | -0.0001 | 3153 | 3163 | 3176 | 3181 |
|      |          |   |            | C | 2.4630  | -1.0866 | -0.0001 | 3195 | 3223 | 3476 |      |
|      |          |   |            | H | 2.9472  | -2.0607 | -0.0001 |      |      |      |      |
|      |          |   |            | C | 3.2339  | 0.0197  | 0.0000  |      |      |      |      |
|      |          |   |            | C | 4.6813  | -0.0057 | 0.0000  |      |      |      |      |
|      |          |   |            | H | 5.1505  | -0.9878 | -0.0002 |      |      |      |      |
|      |          |   |            | C | 5.4575  | 1.0883  | 0.0001  |      |      |      |      |
|      |          |   |            | H | 5.0297  | 2.0857  | 0.0002  |      |      |      |      |
|      |          |   |            | H | 6.5383  | 1.0173  | 0.0000  |      |      |      |      |
|      |          |   |            | H | 2.7558  | 0.9970  | 0.0002  |      |      |      |      |
| CS21 | 0.211293 | A | 2133.63287 | C | 3.6769  | 0.3905  | 0.0001  | 37   | 102  | 134  | 164  |
|      |          | B | 3475.10892 | C | 3.0820  | -0.8837 | 0.0000  | 185  | 220  | 238  | 295  |
|      |          | C | 5598.06311 | C | 1.6636  | -1.0452 | 0.0000  | 364  | 381  | 412  | 470  |
|      |          |   |            | C | 0.7977  | 0.0695  | 0.0000  | 496  | 499  | 502  | 531  |
|      |          |   |            | C | 1.4090  | 1.4575  | 0.0001  | 544  | 586  | 593  | 621  |
|      |          |   |            | C | 2.9038  | 1.5135  | 0.0001  | 649  | 666  | 681  | 685  |
|      |          |   |            | C | 1.1263  | -2.3685 | 0.0000  | 718  | 755  | 770  | 789  |
|      |          |   |            | C | -0.6228 | -0.1286 | 0.0000  | 807  | 840  | 844  | 930  |
|      |          |   |            | C | -1.1257 | -1.4797 | 0.0000  | 932  | 934  | 968  | 976  |
|      |          |   |            | C | -0.2158 | -2.5756 | -0.0001 | 983  | 993  | 1003 | 1090 |
|      |          |   |            | C | -2.5113 | -1.7439 | -0.0001 | 1118 | 1151 | 1179 | 1184 |
|      |          |   |            | H | -2.8384 | -2.7783 | -0.0001 | 1199 | 1218 | 1219 | 1246 |
|      |          |   |            | C | -3.4308 | -0.7205 | -0.0001 | 1265 | 1307 | 1337 | 1345 |
|      |          |   |            | C | -2.9762 | 0.6025  | 0.0000  | 1387 | 1415 | 1425 | 1440 |
|      |          |   |            | C | -1.6183 | 0.9229  | 0.0000  | 1455 | 1475 | 1532 | 1570 |
|      |          |   |            | H | 1.8148  | -3.2069 | 0.0000  | 1583 | 1620 | 1644 | 2179 |
|      |          |   |            | H | 4.7587  | 0.4739  | 0.0001  | 2984 | 2987 | 3155 | 3159 |
|      |          |   |            | H | 3.7011  | -1.7733 | 0.0000  | 3164 | 3171 | 3178 | 3181 |
|      |          |   |            | H | 1.0330  | 2.0266  | -0.8612 | 3184 | 3196 | 3473 |      |
|      |          |   |            | H | 3.3595  | 2.4979  | 0.0001  |      |      |      |      |
|      |          |   |            | H | -0.6211 | -3.5818 | -0.0001 |      |      |      |      |
|      |          |   |            | H | -4.4945 | -0.9271 | -0.0001 |      |      |      |      |
|      |          |   |            | H | -3.6906 | 1.4164  | 0.0000  |      |      |      |      |
|      |          |   |            | H | 1.0330  | 2.0266  | 0.8613  |      |      |      |      |
|      |          |   |            | C | -1.3533 | 2.3286  | 0.0000  |      |      |      |      |
|      |          |   |            | C | -1.2835 | 3.5332  | 0.0000  |      |      |      |      |
|      |          |   |            | H | -1.1850 | 4.5910  | 0.0001  |      |      |      |      |
| CS22 | 0.212430 | A | 2081.82819 | C | 3.6380  | 0.7403  | -0.0463 | 58   | 98   | 127  | 156  |

|      |          |   |            |   |         |         |         |      |      |      |      |
|------|----------|---|------------|---|---------|---------|---------|------|------|------|------|
|      |          | B | 3532.86060 | C | 3.1992  | -0.5530 | 0.1419  | 224  | 239  | 279  | 319  |
|      |          | C | 5553.36521 | C | 1.8233  | -0.8701 | 0.1227  | 343  | 403  | 416  | 479  |
|      |          |   |            | C | 0.8535  | 0.1674  | -0.0343 | 507  | 510  | 516  | 539  |
|      |          |   |            | C | 1.3450  | 1.4700  | -0.2938 | 568  | 583  | 615  | 668  |
|      |          |   |            | C | 2.6983  | 1.7525  | -0.2946 | 678  | 725  | 733  | 756  |
|      |          |   |            | C | 1.4027  | -2.2377 | 0.1899  | 782  | 789  | 802  | 837  |
|      |          |   |            | C | -0.5677 | -0.1741 | 0.0040  | 847  | 860  | 881  | 889  |
|      |          |   |            | C | -0.9209 | -1.5584 | -0.0480 | 927  | 971  | 980  | 988  |
|      |          |   |            | C | 0.0951  | -2.5661 | 0.0564  | 997  | 1002 | 1012 | 1068 |
|      |          |   |            | C | -2.2704 | -1.9496 | -0.1685 | 1113 | 1150 | 1174 | 1184 |
|      |          |   |            | H | -2.5027 | -3.0078 | -0.2236 | 1193 | 1221 | 1240 | 1241 |
|      |          |   |            | C | -3.2760 | -1.0082 | -0.1996 | 1264 | 1292 | 1322 | 1344 |
|      |          |   |            | C | -2.9535 | 0.3425  | -0.0376 | 1362 | 1416 | 1446 | 1464 |
|      |          |   |            | C | -1.6354 | 0.7756  | 0.0896  | 1479 | 1527 | 1556 | 1601 |
|      |          |   |            | H | 2.1591  | -3.0072 | 0.3024  | 1622 | 1640 | 1648 | 1658 |
|      |          |   |            | H | 4.6979  | 0.9678  | -0.0360 | 3029 | 3157 | 3159 | 3163 |
|      |          |   |            | H | 3.9130  | -1.3578 | 0.2846  | 3170 | 3176 | 3178 | 3186 |
|      |          |   |            | H | 0.6562  | 2.2631  | -0.5407 | 3190 | 3227 | 3245 |      |
|      |          |   |            | H | 3.0324  | 2.7622  | -0.5052 |      |      |      |      |
|      |          |   |            | H | -0.2154 | -3.6055 | 0.0494  |      |      |      |      |
|      |          |   |            | H | -4.3127 | -1.3096 | -0.2964 |      |      |      |      |
|      |          |   |            | H | -3.7438 | 1.0794  | 0.0425  |      |      |      |      |
|      |          |   |            | C | -1.4311 | 2.2030  | 0.4402  |      |      |      |      |
|      |          |   |            | C | -2.1418 | 3.2201  | 0.0078  |      |      |      |      |
|      |          |   |            | H | -2.1890 | 4.2865  | 0.1682  |      |      |      |      |
|      |          |   |            | H | -0.6452 | 2.4048  | 1.1755  |      |      |      |      |
| CS23 | 0.214547 | A | 1822.34400 | C | -3.5354 | -0.0585 | -0.0604 | 81   | 133  | 193  | 216  |
|      |          | B | 3283.97187 | C | -2.8884 | 1.1599  | -0.0209 | 244  | 337  | 382  | 396  |
|      |          | C | 5062.75504 | C | -1.4770 | 1.2260  | 0.0261  | 442  | 457  | 487  | 498  |
|      |          |   |            | C | -0.7271 | 0.0093  | 0.0699  | 506  | 521  | 538  | 550  |
|      |          |   |            | C | -1.4143 | -1.2467 | -0.0157 | 580  | 650  | 673  | 679  |
|      |          |   |            | C | -2.7985 | -1.2584 | -0.0765 | 705  | 732  | 761  | 774  |
|      |          |   |            | C | -0.7663 | 2.4617  | 0.0189  | 798  | 811  | 818  | 844  |
|      |          |   |            | C | 0.6829  | 0.0532  | 0.1396  | 849  | 911  | 946  | 959  |
|      |          |   |            | C | 1.3653  | 1.2792  | 0.0476  | 971  | 978  | 987  | 990  |
|      |          |   |            | C | 0.5998  | 2.4867  | 0.0061  | 1061 | 1073 | 1093 | 1098 |
|      |          |   |            | C | 2.7860  | 1.2850  | -0.0755 | 1141 | 1168 | 1173 | 1188 |
|      |          |   |            | H | 3.3029  | 2.2342  | -0.1595 | 1198 | 1216 | 1231 | 1255 |
|      |          |   |            | C | 3.4996  | 0.0778  | -0.2305 | 1260 | 1294 | 1334 | 1371 |
|      |          |   |            | C | 2.8875  | -1.1367 | -0.0862 | 1397 | 1413 | 1418 | 1425 |
|      |          |   |            | C | 1.4653  | -1.2173 | 0.3959  | 1457 | 1476 | 1520 | 1553 |
|      |          |   |            | C | 0.7117  | -2.4634 | 0.0090  | 1584 | 1621 | 1628 | 1681 |
|      |          |   |            | C | -0.6214 | -2.4653 | -0.1264 | 2750 | 3148 | 3155 | 3156 |
|      |          |   |            | H | -1.1473 | -3.3887 | -0.3492 | 3158 | 3165 | 3169 | 3172 |

|      |          |   |            |   |         |         |         |      |      |      |      |
|------|----------|---|------------|---|---------|---------|---------|------|------|------|------|
|      |          |   |            | H | 1.2811  | -3.3824 | -0.0896 | 3174 | 3182 | 3184 |      |
|      |          |   |            | H | -1.3311 | 3.3880  | -0.0015 |      |      |      |      |
|      |          |   |            | H | -4.6182 | -0.0962 | -0.0999 |      |      |      |      |
|      |          |   |            | H | -3.4577 | 2.0833  | -0.0364 |      |      |      |      |
|      |          |   |            | H | -3.3199 | -2.2070 | -0.1527 |      |      |      |      |
|      |          |   |            | H | 1.1279  | 3.4335  | -0.0413 |      |      |      |      |
|      |          |   |            | H | 4.5527  | 0.1203  | -0.4894 |      |      |      |      |
|      |          |   |            | H | 3.4390  | -2.0617 | -0.2153 |      |      |      |      |
|      |          |   |            | H | 1.5525  | -1.2786 | 1.5089  |      |      |      |      |
| CS24 | 0.142679 | A | 1201.89511 | C | -1.8608 | -1.9119 | 0.0000  | 105  | 126  | 169  | 201  |
|      |          | B | 1898.15438 | C | -0.5478 | -1.5764 | -0.0001 | 339  | 364  | 443  | 453  |
|      |          | C | 3100.04949 | C | -0.0186 | -0.2824 | 0.0000  | 476  | 489  | 542  | 577  |
|      |          |   |            | C | -0.9813 | 0.7855  | 0.0002  | 592  | 626  | 647  | 694  |
|      |          |   |            | C | -2.3661 | 0.4633  | 0.0003  | 702  | 749  | 757  | 798  |
|      |          |   |            | C | -2.7999 | -0.8411 | 0.0002  | 812  | 867  | 883  | 926  |
|      |          |   |            | C | 1.3807  | 0.0241  | -0.0001 | 970  | 988  | 1020 | 1051 |
|      |          |   |            | C | -0.5109 | 2.1235  | 0.0002  | 1087 | 1164 | 1188 | 1196 |
|      |          |   |            | H | -3.0856 | 1.2749  | 0.0004  | 1238 | 1262 | 1343 | 1358 |
|      |          |   |            | H | -3.8612 | -1.0657 | 0.0003  | 1398 | 1452 | 1464 | 1506 |
|      |          |   |            | C | 0.8373  | 2.3952  | 0.0001  | 1583 | 1621 | 1651 | 2199 |
|      |          |   |            | C | 1.7832  | 1.3503  | -0.0001 | 3159 | 3163 | 3170 | 3180 |
|      |          |   |            | H | -1.2344 | 2.9321  | 0.0004  | 3182 | 3195 | 3477 |      |
|      |          |   |            | H | 1.1844  | 3.4222  | 0.0001  |      |      |      |      |
|      |          |   |            | H | 2.8418  | 1.5796  | -0.0002 |      |      |      |      |
|      |          |   |            | C | 2.3409  | -1.0298 | -0.0003 |      |      |      |      |
|      |          |   |            | C | 3.1568  | -1.9166 | -0.0005 |      |      |      |      |
|      |          |   |            | H | 3.8719  | -2.7024 | -0.0006 |      |      |      |      |
|      |          |   |            | H | -2.1981 | -2.9425 | 0.0000  |      |      |      |      |
| CS25 | 0.207298 | A | 2085.42594 | C | 0.8473  | -1.8113 | -0.0899 | 27   | 44   | 62   | 130  |
|      |          | B | 4609.11605 | C | 0.5026  | -0.4706 | -0.1623 | 153  | 172  | 185  | 196  |
|      |          | C | 6620.10735 | C | -0.8830 | -0.0939 | -0.0679 | 235  | 325  | 344  | 369  |
|      |          |   |            | C | -1.8576 | -1.1489 | 0.0311  | 392  | 475  | 479  | 502  |
|      |          |   |            | C | -1.4424 | -2.5034 | 0.0931  | 515  | 527  | 547  | 564  |
|      |          |   |            | C | -0.1113 | -2.8286 | 0.0526  | 586  | 614  | 635  | 650  |
|      |          |   |            | C | -1.3825 | 1.2604  | -0.0419 | 686  | 701  | 744  | 767  |
|      |          |   |            | C | -3.2429 | -0.8477 | 0.0764  | 775  | 798  | 811  | 812  |
|      |          |   |            | H | -2.2010 | -3.2744 | 0.1717  | 844  | 905  | 922  | 933  |
|      |          |   |            | H | 0.2067  | -3.8638 | 0.1014  | 938  | 985  | 991  | 1000 |
|      |          |   |            | C | -3.6863 | 0.4494  | 0.0473  | 1046 | 1092 | 1115 | 1139 |
|      |          |   |            | C | -2.7528 | 1.4965  | 0.0010  | 1185 | 1189 | 1193 | 1230 |
|      |          |   |            | H | -3.9470 | -1.6706 | 0.1389  | 1244 | 1279 | 1298 | 1351 |
|      |          |   |            | H | -4.7459 | 0.6747  | 0.0789  | 1369 | 1386 | 1420 | 1458 |
|      |          |   |            | H | -3.0953 | 2.5238  | 0.0167  | 1483 | 1490 | 1540 | 1604 |
|      |          |   |            | C | -0.5648 | 2.4333  | -0.0036 | 1627 | 1641 | 1889 | 2188 |

|      |          |   |            |   |         |         |         |      |      |      |      |
|------|----------|---|------------|---|---------|---------|---------|------|------|------|------|
|      |          |   |            | C | 0.0098  | 3.4918  | 0.0568  | 3098 | 3122 | 3148 | 3163 |
|      |          |   |            | H | 0.5512  | 4.4045  | 0.1098  | 3166 | 3177 | 3182 | 3189 |
|      |          |   |            | H | 1.8943  | -2.0768 | -0.1772 | 3196 | 3249 | 3474 |      |
|      |          |   |            | C | 1.5920  | 0.5120  | -0.3933 |      |      |      |      |
|      |          |   |            | H | 1.3467  | 1.3852  | -0.9924 |      |      |      |      |
|      |          |   |            | C | 2.8185  | 0.3913  | 0.0409  |      |      |      |      |
|      |          |   |            | C | 4.0870  | 0.3268  | 0.4950  |      |      |      |      |
|      |          |   |            | H | 4.2842  | 0.8055  | 1.4548  |      |      |      |      |
|      |          |   |            | C | 5.1560  | -0.2953 | -0.1503 |      |      |      |      |
|      |          |   |            | H | 5.0273  | -0.7839 | -1.1079 |      |      |      |      |
|      |          |   |            | H | 6.1418  | -0.2952 | 0.2954  |      |      |      |      |
| CS26 | 0.207871 | A | 2164.88647 | C | -0.1860 | -2.3285 | 0.0806  | 31   | 40   | 52   | 100  |
|      |          | B | 4570.65370 | C | -0.3087 | -0.9406 | 0.0715  | 122  | 161  | 193  | 198  |
|      |          | C | 6706.54911 | C | 0.8771  | -0.1147 | 0.0574  | 249  | 287  | 326  | 348  |
|      |          |   |            | C | 2.1441  | -0.7902 | -0.0339 | 402  | 436  | 473  | 488  |
|      |          |   |            | C | 2.2057  | -2.2072 | -0.0303 | 508  | 538  | 549  | 567  |
|      |          |   |            | C | 1.0638  | -2.9644 | 0.0421  | 601  | 637  | 650  | 673  |
|      |          |   |            | C | 0.8866  | 1.3221  | 0.1078  | 693  | 759  | 770  | 774  |
|      |          |   |            | C | 3.3457  | -0.0437 | -0.1356 | 801  | 822  | 843  | 864  |
|      |          |   |            | H | 3.1796  | -2.6811 | -0.0896 | 901  | 921  | 937  | 938  |
|      |          |   |            | H | 1.1164  | -4.0469 | 0.0491  | 984  | 991  | 1000 | 1018 |
|      |          |   |            | C | 3.3197  | 1.3271  | -0.1381 | 1052 | 1102 | 1116 | 1155 |
|      |          |   |            | C | 2.0929  | 1.9979  | -0.0002 | 1189 | 1201 | 1228 | 1253 |
|      |          |   |            | H | 4.2846  | -0.5816 | -0.2089 | 1271 | 1304 | 1317 | 1349 |
|      |          |   |            | H | 4.2384  | 1.8971  | -0.2170 | 1371 | 1393 | 1446 | 1459 |
|      |          |   |            | H | 2.0785  | 3.0796  | 0.0584  | 1483 | 1538 | 1600 | 1624 |
|      |          |   |            | C | -0.3313 | 2.1335  | 0.3393  | 1634 | 1646 | 1656 | 2280 |
|      |          |   |            | C | -0.5505 | 3.3391  | -0.1360 | 3074 | 3124 | 3146 | 3162 |
|      |          |   |            | H | -1.3232 | 4.0901  | -0.0717 | 3166 | 3178 | 3181 | 3190 |
|      |          |   |            | H | -1.0917 | -2.9222 | 0.0962  | 3195 | 3236 | 3243 |      |
|      |          |   |            | C | -1.6402 | -0.4393 | 0.0190  |      |      |      |      |
|      |          |   |            | C | -2.8140 | -0.1446 | -0.0576 |      |      |      |      |
|      |          |   |            | C | -4.1548 | 0.2985  | -0.1584 |      |      |      |      |
|      |          |   |            | H | -4.2884 | 1.3653  | -0.3277 |      |      |      |      |
|      |          |   |            | C | -5.2365 | -0.4893 | -0.0650 |      |      |      |      |
|      |          |   |            | H | -5.1505 | -1.5565 | 0.1013  |      |      |      |      |
|      |          |   |            | H | -6.2330 | -0.0747 | -0.1551 |      |      |      |      |
|      |          |   |            | H | -1.0926 | 1.6981  | 0.9885  |      |      |      |      |
| CS27 | 0.211349 | A | 1696.79457 | C | 0.7034  | 1.7796  | -0.1106 | 38   | 56   | 126  | 154  |
|      |          | B | 4569.26463 | C | 0.4093  | 0.4237  | -0.0924 | 180  | 216  | 226  | 319  |
|      |          | C | 6164.12146 | C | -0.9550 | 0.0123  | -0.0170 | 346  | 357  | 441  | 474  |
|      |          |   |            | C | -1.9896 | 0.9973  | 0.0312  | 479  | 495  | 502  | 510  |
|      |          |   |            | C | -1.6371 | 2.3678  | 0.0062  | 535  | 563  | 575  | 610  |
|      |          |   |            | C | -0.3142 | 2.7463  | -0.0621 | 646  | 680  | 702  | 751  |

|      |          |   |            |   |         |         |         |      |      |      |      |
|------|----------|---|------------|---|---------|---------|---------|------|------|------|------|
|      |          |   |            | C | -1.3090 | -1.3746 | 0.0123  | 759  | 775  | 797  | 807  |
|      |          |   |            | C | -3.3455 | 0.5724  | 0.1038  | 826  | 834  | 907  | 908  |
|      |          |   |            | H | -2.4232 | 3.1144  | 0.0430  | 915  | 927  | 981  | 988  |
|      |          |   |            | H | -0.0497 | 3.7977  | -0.0787 | 992  | 1013 | 1055 | 1097 |
|      |          |   |            | C | -3.6620 | -0.7642 | 0.1291  | 1118 | 1134 | 1152 | 1179 |
|      |          |   |            | C | -2.6438 | -1.7387 | 0.0841  | 1187 | 1202 | 1222 | 1240 |
|      |          |   |            | H | -4.1265 | 1.3244  | 0.1393  | 1260 | 1298 | 1362 | 1382 |
|      |          |   |            | H | -4.6986 | -1.0771 | 0.1848  | 1391 | 1419 | 1428 | 1465 |
|      |          |   |            | H | -2.9065 | -2.7912 | 0.1068  | 1486 | 1492 | 1537 | 1611 |
|      |          |   |            | C | -0.2472 | -2.3636 | -0.0322 | 1621 | 1630 | 1668 | 1842 |
|      |          |   |            | C | 1.0510  | -2.0167 | -0.1059 | 3074 | 3148 | 3158 | 3160 |
|      |          |   |            | H | 1.8263  | -2.7728 | -0.1388 | 3161 | 3167 | 3173 | 3184 |
|      |          |   |            | H | 1.7388  | 2.0971  | -0.1624 | 3185 | 3188 | 3250 |      |
|      |          |   |            | C | 1.4767  | -0.6141 | -0.1514 |      |      |      |      |
|      |          |   |            | H | -0.5276 | -3.4116 | -0.0043 |      |      |      |      |
|      |          |   |            | C | 2.7624  | -0.3167 | -0.2475 |      |      |      |      |
|      |          |   |            | C | 4.0704  | -0.0254 | -0.3720 |      |      |      |      |
|      |          |   |            | H | 4.4583  | 0.0646  | -1.3892 |      |      |      |      |
|      |          |   |            | C | 4.9713  | 0.1730  | 0.6770  |      |      |      |      |
|      |          |   |            | H | 4.6550  | 0.0989  | 1.7097  |      |      |      |      |
|      |          |   |            | H | 6.0080  | 0.4060  | 0.4727  |      |      |      |      |
| CS28 | 0.212432 | A | 1698.20085 | C | 0.0725  | 2.1273  | -0.0473 | 50   | 77   | 136  | 165  |
|      |          | B | 4422.81799 | C | 0.2597  | 0.7692  | -0.0787 | 176  | 211  | 238  | 266  |
|      |          | C | 6068.29012 | C | -0.9480 | -0.0070 | -0.0252 | 348  | 389  | 446  | 457  |
|      |          |   |            | C | -2.2194 | 0.6424  | 0.0584  | 468  | 485  | 502  | 528  |
|      |          |   |            | C | -2.2839 | 2.0575  | 0.0852  | 537  | 595  | 613  | 646  |
|      |          |   |            | C | -1.1239 | 2.8149  | 0.0315  | 676  | 693  | 755  | 762  |
|      |          |   |            | C | -0.8858 | -1.4344 | -0.0560 | 773  | 787  | 807  | 827  |
|      |          |   |            | C | -3.3943 | -0.1585 | 0.1151  | 837  | 891  | 907  | 912  |
|      |          |   |            | H | -3.2519 | 2.5442  | 0.1477  | 933  | 945  | 982  | 998  |
|      |          |   |            | H | -1.1607 | 3.8985  | 0.0503  | 1012 | 1031 | 1054 | 1095 |
|      |          |   |            | C | -3.3136 | -1.5307 | 0.0868  | 1108 | 1132 | 1143 | 1183 |
|      |          |   |            | C | -2.0610 | -2.1696 | -0.0007 | 1202 | 1226 | 1257 | 1284 |
|      |          |   |            | H | -4.3584 | 0.3338  | 0.1821  | 1320 | 1332 | 1368 | 1376 |
|      |          |   |            | H | -4.2167 | -2.1288 | 0.1305  | 1395 | 1429 | 1456 | 1462 |
|      |          |   |            | H | -2.0104 | -3.2531 | -0.0273 | 1480 | 1511 | 1572 | 1580 |
|      |          |   |            | C | 0.4148  | -2.0612 | -0.1724 | 1614 | 1627 | 1650 | 1665 |
|      |          |   |            | C | 1.5607  | -1.3464 | -0.2047 | 3109 | 3129 | 3143 | 3158 |
|      |          |   |            | H | 2.5051  | -1.8590 | -0.3261 | 3160 | 3162 | 3169 | 3176 |
|      |          |   |            | C | 1.5773  | 0.1030  | -0.1315 | 3185 | 3208 | 3227 |      |
|      |          |   |            | H | 0.4494  | -3.1429 | -0.2534 |      |      |      |      |
|      |          |   |            | C | 2.7232  | 0.8503  | -0.1498 |      |      |      |      |
|      |          |   |            | C | 4.1115  | 0.4228  | -0.1246 |      |      |      |      |
|      |          |   |            | H | 4.7936  | 1.0937  | -0.6456 |      |      |      |      |

|      |          |   |            |   |         |         |         |      |      |      |      |
|------|----------|---|------------|---|---------|---------|---------|------|------|------|------|
|      |          |   |            | C | 4.6549  | -0.6291 | 0.5100  |      |      |      |      |
|      |          |   |            | H | 4.0731  | -1.3027 | 1.1275  |      |      |      |      |
|      |          |   |            | H | 5.7214  | -0.8140 | 0.4573  |      |      |      |      |
|      |          |   |            | H | 2.5875  | 1.9274  | -0.2196 |      |      |      |      |
| CS29 | 0.215186 | A | 1790.74654 | C | 3.5684  | -0.0370 | -0.0004 | 86   | 98   | 183  | 205  |
|      |          | B | 3350.31294 | C | 2.8914  | 1.1818  | -0.0003 | 254  | 321  | 347  | 403  |
|      |          | C | 5130.19078 | C | 1.4822  | 1.2266  | -0.0002 | 431  | 452  | 486  | 493  |
|      |          |   |            | C | 0.7499  | -0.0031 | -0.0001 | 505  | 513  | 541  | 541  |
|      |          |   |            | C | 1.4525  | -1.2455 | -0.0001 | 590  | 655  | 660  | 683  |
|      |          |   |            | C | 2.8692  | -1.2355 | -0.0003 | 732  | 736  | 749  | 786  |
|      |          |   |            | C | 0.7580  | 2.4514  | -0.0001 | 800  | 809  | 828  | 837  |
|      |          |   |            | C | -0.6775 | 0.0117  | 0.0001  | 884  | 936  | 943  | 952  |
|      |          |   |            | C | -1.3674 | 1.2703  | 0.0001  | 966  | 970  | 976  | 987  |
|      |          |   |            | C | -0.6237 | 2.4606  | 0.0000  | 998  | 1096 | 1134 | 1144 |
|      |          |   |            | C | -2.8135 | 1.2747  | 0.0003  | 1168 | 1191 | 1202 | 1209 |
|      |          |   |            | H | -3.3153 | 2.2377  | 0.0003  | 1215 | 1224 | 1242 | 1262 |
|      |          |   |            | C | -3.5363 | 0.1404  | 0.0004  | 1317 | 1338 | 1367 | 1380 |
|      |          |   |            | C | -2.9053 | -1.2194 | 0.0003  | 1407 | 1431 | 1447 | 1448 |
|      |          |   |            | C | -1.3933 | -1.2084 | 0.0002  | 1457 | 1493 | 1524 | 1545 |
|      |          |   |            | C | -0.6823 | -2.4170 | 0.0001  | 1583 | 1594 | 1602 | 1660 |
|      |          |   |            | C | 0.6993  | -2.4468 | 0.0000  | 2960 | 2961 | 3147 | 3149 |
|      |          |   |            | H | 1.2235  | -3.3965 | -0.0001 | 3155 | 3159 | 3168 | 3169 |
|      |          |   |            | H | -1.2348 | -3.3521 | 0.0002  | 3173 | 3175 | 3183 |      |
|      |          |   |            | H | 1.3095  | 3.3853  | -0.0002 |      |      |      |      |
|      |          |   |            | H | 4.6528  | -0.0472 | -0.0005 |      |      |      |      |
|      |          |   |            | H | 3.4477  | 2.1130  | -0.0004 |      |      |      |      |
|      |          |   |            | H | 3.4021  | -2.1803 | -0.0003 |      |      |      |      |
|      |          |   |            | H | -1.1546 | 3.4073  | 0.0001  |      |      |      |      |
|      |          |   |            | H | -4.6207 | 0.1850  | 0.0005  |      |      |      |      |
|      |          |   |            | H | -3.2695 | -1.7896 | 0.8693  |      |      |      |      |
|      |          |   |            | H | -3.2697 | -1.7896 | -0.8685 |      |      |      |      |
| TS1  | 0.173804 | A | 834.13395  | C | 1.2285  | 0.8262  | 0.8253  | -423 | 25   | 47   | 76   |
|      |          | B | 3222.61892 | C | 1.7694  | -0.3418 | 1.3747  | 139  | 153  | 309  | 389  |
|      |          | C | 3499.69995 | C | 2.5906  | -1.1016 | 0.5454  | 395  | 437  | 570  | 588  |
|      |          |   |            | C | 2.9579  | -0.6226 | -0.7209 | 608  | 612  | 655  | 686  |
|      |          |   |            | C | 2.5349  | 0.6401  | -1.1554 | 712  | 724  | 780  | 832  |
|      |          |   |            | C | 1.7127  | 1.4223  | -0.3471 | 873  | 899  | 931  | 960  |
|      |          |   |            | C | -0.8143 | 0.1975  | 0.2029  | 968  | 980  | 983  | 990  |
|      |          |   |            | C | -1.1325 | -1.0934 | -0.1668 | 997  | 1014 | 1021 | 1049 |
|      |          |   |            | C | -2.4769 | -1.3893 | -0.4233 | 1076 | 1080 | 1168 | 1170 |
|      |          |   |            | C | -3.4490 | -0.3951 | -0.2987 | 1175 | 1180 | 1298 | 1307 |
|      |          |   |            | C | -3.0892 | 0.8985  | 0.0800  | 1315 | 1323 | 1429 | 1443 |
|      |          |   |            | C | -1.7462 | 1.2075  | 0.3323  | 1460 | 1474 | 1542 | 1562 |
|      |          |   |            | H | 1.5136  | -0.6746 | 2.3741  | 1576 | 1621 | 3144 | 3150 |

|     |          |   |            |   |         |         |         |       |      |      |      |
|-----|----------|---|------------|---|---------|---------|---------|-------|------|------|------|
|     |          |   |            | H | 2.9794  | -2.0514 | 0.8988  | 3154  | 3160 | 3160 | 3165 |
|     |          |   |            | H | 3.6194  | -1.2115 | -1.3457 | 3177  | 3178 | 3182 | 3188 |
|     |          |   |            | H | 2.8799  | 1.0304  | -2.1073 |       |      |      |      |
|     |          |   |            | H | 1.4204  | 2.4227  | -0.6450 |       |      |      |      |
|     |          |   |            | H | -0.3706 | -1.8616 | -0.2531 |       |      |      |      |
|     |          |   |            | H | -2.7625 | -2.3947 | -0.7168 |       |      |      |      |
|     |          |   |            | H | -4.4890 | -0.6296 | -0.4968 |       |      |      |      |
|     |          |   |            | H | -3.8480 | 1.6687  | 0.1770  |       |      |      |      |
|     |          |   |            | H | -1.4573 | 2.2125  | 0.6248  |       |      |      |      |
| TS2 | 0.178725 | A | 671.04825  | C | -0.7268 | -0.0434 | -0.0114 | -878  | 64   | 91   | 117  |
|     |          | B | 3334.04079 | C | -1.4522 | -1.1958 | -0.3725 | 182   | 263  | 281  | 314  |
|     |          | C | 3837.48601 | C | -2.8450 | -1.2000 | -0.3806 | 369   | 415  | 422  | 502  |
|     |          |   |            | C | -3.5625 | -0.0566 | -0.0300 | 558   | 615  | 620  | 635  |
|     |          |   |            | C | -2.8710 | 1.1032  | 0.3355  | 704   | 711  | 750  | 751  |
|     |          |   |            | C | -1.4932 | 1.0665  | 0.3246  | 785   | 856  | 860  | 913  |
|     |          |   |            | C | 0.7581  | -0.0324 | -0.0073 | 933   | 953  | 966  | 985  |
|     |          |   |            | C | 1.4822  | -1.1354 | 0.4680  | 990   | 1002 | 1013 | 1020 |
|     |          |   |            | C | 2.8745  | -1.1306 | 0.4622  | 1026  | 1053 | 1070 | 1100 |
|     |          |   |            | C | 3.5704  | -0.0229 | -0.0191 | 1130  | 1179 | 1182 | 1205 |
|     |          |   |            | C | 2.8622  | 1.0804  | -0.4930 | 1250  | 1296 | 1321 | 1322 |
|     |          |   |            | C | 1.4701  | 1.0764  | -0.4866 | 1355  | 1439 | 1476 | 1480 |
|     |          |   |            | H | -0.9104 | -2.0864 | -0.6730 | 1527  | 1575 | 1614 | 1628 |
|     |          |   |            | H | -3.3736 | -2.1010 | -0.6710 | 1641  | 2341 | 3158 | 3161 |
|     |          |   |            | H | -4.6470 | -0.0640 | -0.0374 | 3164  | 3169 | 3174 | 3179 |
|     |          |   |            | H | -3.4049 | 2.0016  | 0.6272  | 3186  | 3187 | 3193 |      |
|     |          |   |            | H | -0.8545 | 2.3017  | 0.8649  |       |      |      |      |
|     |          |   |            | H | 0.9510  | -1.9924 | 0.8665  |       |      |      |      |
|     |          |   |            | H | 3.4161  | -1.9898 | 0.8424  |       |      |      |      |
|     |          |   |            | H | 4.6545  | -0.0189 | -0.0235 |       |      |      |      |
|     |          |   |            | H | 3.3945  | 1.9446  | -0.8745 |       |      |      |      |
|     |          |   |            | H | 0.9272  | 1.9312  | -0.8719 |       |      |      |      |
|     |          |   |            | H | -0.5538 | 3.0175  | 1.2125  |       |      |      |      |
| TSa | 0.173588 | A | 1207.86033 | C | 0.7028  | -0.3218 | 0.0547  | -1184 | 51   | 57   | 83   |
|     |          | B | 3358.15583 | C | 1.4273  | -1.5169 | 0.2340  | 104   | 134  | 262  | 300  |
|     |          | C | 4354.75361 | C | 2.8193  | -1.5244 | 0.2370  | 359   | 409  | 418  | 424  |
|     |          |   |            | C | 3.5407  | -0.3432 | 0.0662  | 507   | 555  | 615  | 631  |
|     |          |   |            | C | 2.8558  | 0.8639  | -0.1131 | 639   | 697  | 710  | 737  |
|     |          |   |            | C | 1.4788  | 0.8184  | -0.1134 | 756   | 767  | 781  | 853  |
|     |          |   |            | C | -0.7794 | -0.2891 | 0.0550  | 860   | 931  | 952  | 984  |
|     |          |   |            | C | -1.5215 | -1.3160 | -0.5453 | 991   | 1004 | 1011 | 1020 |
|     |          |   |            | C | -2.9129 | -1.2803 | -0.5464 | 1041  | 1044 | 1056 | 1088 |
|     |          |   |            | C | -3.5891 | -0.2167 | 0.0507  | 1104  | 1141 | 1179 | 1183 |
|     |          |   |            | C | -2.8631 | 0.8107  | 0.6491  | 1206  | 1252 | 1298 | 1319 |
|     |          |   |            | C | -1.4710 | 0.7743  | 0.6555  | 1323  | 1356 | 1448 | 1475 |



|     |          |   |            |   |         |         |         |       |      |      |      |
|-----|----------|---|------------|---|---------|---------|---------|-------|------|------|------|
|     |          |   |            | H | 0.8823  | -2.4406 | 0.3960  | 1484  | 1527 | 1575 | 1613 |
|     |          |   |            | H | 3.3464  | -2.4600 | 0.3853  | 1624  | 1638 | 3162 | 3164 |
|     |          |   |            | H | 4.6248  | -0.3525 | 0.0728  | 3167  | 3172 | 3176 | 3182 |
|     |          |   |            | H | 3.3919  | 1.7952  | -0.2543 | 3183  | 3191 | 3192 |      |
|     |          |   |            | H | 0.8192  | 2.0064  | -0.3835 |       |      |      |      |
|     |          |   |            | H | -1.0065 | -2.1330 | -1.0377 |       |      |      |      |
|     |          |   |            | H | -3.4699 | -2.0783 | -1.0245 |       |      |      |      |
|     |          |   |            | H | -4.6727 | -0.1886 | 0.0467  |       |      |      |      |
|     |          |   |            | H | -3.3791 | 1.6405  | 1.1187  |       |      |      |      |
|     |          |   |            | H | -0.9180 | 1.5634  | 1.1526  |       |      |      |      |
|     |          |   |            | O | 0.2819  | 2.9868  | -0.5720 |       |      |      |      |
| TSb | 0.185631 | A | 1298.63880 | C | 0.6474  | -0.3613 | 0.0515  | -1291 | 42   | 77   | 83   |
|     |          | B | 3373.74805 | C | 1.2924  | -1.5938 | 0.2749  | 114   | 131  | 153  | 264  |
|     |          | C | 4490.24759 | C | 2.6795  | -1.7026 | 0.2788  | 302   | 335  | 397  | 414  |
|     |          |   |            | C | 3.4782  | -0.5827 | 0.0571  | 446   | 504  | 559  | 619  |
|     |          |   |            | C | 2.8714  | 0.6562  | -0.1627 | 630   | 646  | 688  | 707  |
|     |          |   |            | C | 1.4899  | 0.7312  | -0.1605 | 742   | 759  | 784  | 791  |
|     |          |   |            | C | -0.8357 | -0.2737 | 0.0375  | 852   | 863  | 927  | 949  |
|     |          |   |            | C | -1.6003 | -1.3079 | -0.5235 | 962   | 985  | 993  | 1003 |
|     |          |   |            | C | -2.9909 | -1.2476 | -0.5268 | 1014  | 1019 | 1036 | 1055 |
|     |          |   |            | C | -3.6458 | -0.1508 | 0.0308  | 1081  | 1104 | 1130 | 1181 |
|     |          |   |            | C | -2.8973 | 0.8866  | 0.5840  | 1183  | 1210 | 1250 | 1289 |
|     |          |   |            | C | -1.5065 | 0.8281  | 0.5866  | 1313  | 1323 | 1360 | 1386 |
|     |          |   |            | H | 0.6860  | -2.4710 | 0.4710  | 1457  | 1482 | 1489 | 1530 |
|     |          |   |            | H | 3.1387  | -2.6672 | 0.4635  | 1582  | 1616 | 1624 | 1642 |
|     |          |   |            | H | 4.5591  | -0.6656 | 0.0545  | 3161  | 3163 | 3170 | 3172 |
|     |          |   |            | H | 3.4729  | 1.5381  | -0.3510 | 3179  | 3182 | 3189 | 3190 |
|     |          |   |            | H | 1.0001  | 1.8522  | -0.4169 | 3204  | 3767 |      |      |
|     |          |   |            | H | -1.1029 | -2.1544 | -0.9831 |       |      |      |      |
|     |          |   |            | H | -3.5623 | -2.0535 | -0.9738 |       |      |      |      |
|     |          |   |            | H | -4.7288 | -0.1021 | 0.0280  |       |      |      |      |
|     |          |   |            | H | -3.3966 | 1.7465  | 1.0162  |       |      |      |      |
|     |          |   |            | H | -0.9382 | 1.6448  | 1.0124  |       |      |      |      |
|     |          |   |            | O | 0.7060  | 3.0757  | -0.4596 |       |      |      |      |
|     |          |   |            | H | 1.3301  | 3.4359  | 0.1902  |       |      |      |      |
| TS3 | 0.205317 | A | 1800.44857 | C | 0.9390  | -0.4193 | -0.0655 | -308  | 29   | 49   | 66   |
|     |          | B | 3517.74237 | C | 1.5028  | 0.6223  | -0.8174 | 83    | 108  | 133  | 193  |
|     |          | C | 4975.47215 | C | 2.8788  | 0.8361  | -0.8218 | 260   | 306  | 369  | 411  |
|     |          |   |            | C | 3.7196  | 0.0132  | -0.0736 | 416   | 430  | 498  | 558  |
|     |          |   |            | C | 3.1722  | -1.0250 | 0.6789  | 596   | 617  | 634  | 694  |
|     |          |   |            | C | 1.7961  | -1.2392 | 0.6829  | 704   | 713  | 746  | 750  |
|     |          |   |            | C | -0.5279 | -0.6505 | -0.0754 | 782   | 786  | 857  | 863  |
|     |          |   |            | C | -2.8237 | 0.2152  | -0.0677 | 874   | 933  | 951  | 971  |
|     |          |   |            | C | -3.3246 | -1.0893 | -0.1437 | 988   | 989  | 1003 | 1013 |

|     |          |   |            |   |         |         |         |      |      |      |      |
|-----|----------|---|------------|---|---------|---------|---------|------|------|------|------|
|     |          |   |            | C | -2.4385 | -2.1663 | -0.1779 | 1024 | 1027 | 1049 | 1067 |
|     |          |   |            | C | -1.0626 | -1.9528 | -0.1446 | 1097 | 1123 | 1177 | 1181 |
|     |          |   |            | H | 0.8535  | 1.2506  | -1.4163 | 1201 | 1243 | 1295 | 1319 |
|     |          |   |            | H | 3.2957  | 1.6409  | -1.4172 | 1320 | 1353 | 1374 | 1433 |
|     |          |   |            | H | 4.7909  | 0.1794  | -0.0766 | 1470 | 1478 | 1524 | 1536 |
|     |          |   |            | H | 3.8169  | -1.6649 | 1.2711  | 1571 | 1612 | 1624 | 1639 |
|     |          |   |            | H | 1.3791  | -2.0360 | 1.2886  | 3045 | 3140 | 3155 | 3160 |
|     |          |   |            | H | -3.4948 | 1.0659  | -0.0219 | 3161 | 3167 | 3172 | 3177 |
|     |          |   |            | H | -4.3959 | -1.2589 | -0.1719 | 3183 | 3185 | 3190 | 3240 |
|     |          |   |            | H | -2.8204 | -3.1791 | -0.2412 |      |      |      |      |
|     |          |   |            | H | -0.3856 | -2.7991 | -0.2022 |      |      |      |      |
|     |          |   |            | C | -1.4568 | 0.3824  | -0.0363 |      |      |      |      |
|     |          |   |            | C | -0.9146 | 2.4930  | 0.9107  |      |      |      |      |
|     |          |   |            | H | 0.0591  | 2.0742  | 1.1136  |      |      |      |      |
|     |          |   |            | C | -1.4234 | 3.4751  | 0.1834  |      |      |      |      |
|     |          |   |            | H | -2.4164 | 3.8788  | 0.3684  |      |      |      |      |
|     |          |   |            | H | -0.8992 | 3.8794  | -0.6862 |      |      |      |      |
| TS4 | 0.211355 | A | 1510.21073 | C | -0.9427 | -0.3219 | 0.0197  | -863 | 47   | 76   | 86   |
|     |          | B | 3626.94321 | C | -1.6033 | 0.5731  | 0.8500  | 105  | 177  | 196  | 227  |
|     |          | C | 4680.23304 | C | -2.9689 | 0.7619  | 0.8793  | 257  | 289  | 317  | 329  |
|     |          |   |            | C | -3.7550 | 0.0068  | 0.0021  | 420  | 428  | 474  | 541  |
|     |          |   |            | C | -3.1437 | -0.9075 | -0.8551 | 567  | 581  | 620  | 626  |
|     |          |   |            | C | -1.7597 | -1.0734 | -0.8461 | 664  | 715  | 729  | 755  |
|     |          |   |            | C | 0.5344  | -0.5260 | 0.0427  | 777  | 794  | 811  | 864  |
|     |          |   |            | C | 2.8224  | 0.2375  | -0.1551 | 891  | 913  | 938  | 955  |
|     |          |   |            | C | 3.2916  | -1.0367 | 0.1353  | 967  | 969  | 994  | 997  |
|     |          |   |            | C | 2.3867  | -2.0704 | 0.3729  | 1012 | 1022 | 1028 | 1043 |
|     |          |   |            | C | 1.0220  | -1.8102 | 0.3199  | 1061 | 1080 | 1117 | 1134 |
|     |          |   |            | H | -0.8378 | 1.3214  | 1.8944  | 1178 | 1186 | 1220 | 1251 |
|     |          |   |            | H | -3.4224 | 1.4692  | 1.5657  | 1281 | 1306 | 1315 | 1324 |
|     |          |   |            | H | -4.8324 | 0.1316  | -0.0063 | 1343 | 1439 | 1451 | 1469 |
|     |          |   |            | H | -3.7474 | -1.4946 | -1.5380 | 1484 | 1511 | 1574 | 1600 |
|     |          |   |            | H | -1.2941 | -1.7801 | -1.5254 | 1627 | 1635 | 1681 | 2367 |
|     |          |   |            | H | 3.5311  | 1.0249  | -0.3833 | 3137 | 3156 | 3157 | 3163 |
|     |          |   |            | H | 4.3587  | -1.2271 | 0.1602  | 3163 | 3172 | 3173 | 3182 |
|     |          |   |            | H | 2.7404  | -3.0706 | 0.5958  | 3186 | 3191 | 3220 |      |
|     |          |   |            | H | 0.3136  | -2.6070 | 0.5178  |      |      |      |      |
|     |          |   |            | C | 1.4482  | 0.5260  | -0.2010 |      |      |      |      |
|     |          |   |            | C | 0.9780  | 1.8790  | -0.5528 |      |      |      |      |
|     |          |   |            | H | -0.0162 | 1.9339  | -0.9854 |      |      |      |      |
|     |          |   |            | C | 1.6548  | 3.0183  | -0.3804 |      |      |      |      |
|     |          |   |            | H | 2.6331  | 3.0520  | 0.0870  |      |      |      |      |
|     |          |   |            | H | 1.2338  | 3.9668  | -0.6921 |      |      |      |      |
|     |          |   |            | H | -0.4499 | 1.7410  | 2.5214  |      |      |      |      |

|     |          |         |            |         |         |         |         |      |      |      |      |
|-----|----------|---------|------------|---------|---------|---------|---------|------|------|------|------|
| TS5 | 0.199601 | A       | 1309.57873 | C       | 3.4963  | -0.5814 | -0.0754 | -211 | 75   | 84   | 137  |
|     |          | B       | 3367.31637 | C       | 2.8612  | 0.6243  | -0.3427 | 152  | 244  | 272  | 317  |
|     |          | C       | 4535.13640 | C       | 1.4708  | 0.7649  | -0.2196 | 380  | 414  | 422  | 482  |
|     |          |         |            | C       | 0.6838  | -0.3709 | 0.1045  | 503  | 561  | 585  | 602  |
|     |          |         |            | C       | 1.3517  | -1.5733 | 0.3931  | 621  | 685  | 704  | 724  |
|     |          |         |            | C       | 2.7344  | -1.6819 | 0.3160  | 742  | 773  | 781  | 813  |
|     |          |         |            | C       | 0.8617  | 2.0862  | -0.4467 | 857  | 883  | 902  | 945  |
|     |          |         |            | C       | -0.8051 | -0.3512 | 0.0540  | 964  | 969  | 984  | 989  |
|     |          |         |            | C       | -1.5754 | 0.7809  | 0.2782  | 993  | 1020 | 1041 | 1057 |
|     |          |         |            | C       | 0.0091  | 2.6566  | 0.4266  | 1072 | 1117 | 1143 | 1178 |
|     |          |         |            | C       | -2.9491 | 0.8461  | 0.2260  | 1186 | 1221 | 1246 | 1269 |
|     |          |         |            | H       | -3.4831 | 1.7712  | 0.4177  | 1291 | 1299 | 1316 | 1330 |
|     |          |         |            | C       | -3.6445 | -0.3286 | -0.0839 | 1432 | 1438 | 1468 | 1484 |
|     |          |         |            | C       | -2.9293 | -1.4996 | -0.3369 | 1506 | 1567 | 1591 | 1620 |
|     |          |         |            | C       | -1.5385 | -1.5133 | -0.2754 | 1626 | 1636 | 3130 | 3142 |
|     |          |         |            | H       | 1.0811  | 2.5844  | -1.3882 | 3152 | 3159 | 3162 | 3168 |
|     |          |         |            | H       | 4.5746  | -0.6589 | -0.1558 | 3171 | 3181 | 3185 | 3191 |
|     |          |         |            | H       | 3.4478  | 1.4922  | -0.6255 | 3225 |      |      |      |
|     |          |         |            | H       | 0.7748  | -2.4398 | 0.6928  |      |      |      |      |
|     |          |         |            | H       | 3.2151  | -2.6239 | 0.5549  |      |      |      |      |
|     |          |         |            | H       | -0.1002 | 2.2850  | 1.4375  |      |      |      |      |
|     |          |         |            | H       | -4.7284 | -0.3239 | -0.1350 |      |      |      |      |
|     |          | H       | -3.4584    | -2.4094 | -0.5974 |         |         |      |      |      |      |
| H   | -1.0118  | -2.4310 | -0.5120    |         |         |         |         |      |      |      |      |
| H   | -0.4741  | 3.6013  | 0.2027     |         |         |         |         |      |      |      |      |
| TS6 | 0.194996 | A       | 1152.76480 | C       | -3.5689 | -0.3039 | -0.0214 | -629 | 93   | 99   | 203  |
|     |          | B       | 3292.20982 | C       | -2.8418 | 0.8658  | -0.0696 | 233  | 249  | 298  | 345  |
|     |          | C       | 4416.28897 | C       | -1.4272 | 0.8480  | -0.0507 | 408  | 422  | 437  | 446  |
|     |          |         |            | C       | -0.7395 | -0.4001 | 0.0108  | 506  | 513  | 548  | 557  |
|     |          |         |            | C       | -1.5144 | -1.5786 | 0.0634  | 600  | 631  | 722  | 725  |
|     |          |         |            | C       | -2.8958 | -1.5359 | 0.0486  | 730  | 751  | 767  | 797  |
|     |          |         |            | C       | -0.6842 | 2.0664  | -0.0951 | 840  | 842  | 873  | 880  |
|     |          |         |            | C       | 0.7193  | -0.4087 | 0.0034  | 887  | 957  | 966  | 987  |
|     |          |         |            | C       | 1.4219  | 0.8269  | -0.0206 | 992  | 998  | 1016 | 1060 |
|     |          |         |            | C       | 0.6847  | 2.0682  | -0.0175 | 1061 | 1113 | 1164 | 1167 |
|     |          |         |            | C       | 2.8319  | 0.8308  | -0.0437 | 1182 | 1188 | 1222 | 1237 |
|     |          |         |            | H       | 3.3503  | 1.7838  | -0.0563 | 1264 | 1304 | 1321 | 1364 |
|     |          |         |            | C       | 3.5464  | -0.3492 | -0.0448 | 1372 | 1440 | 1448 | 1463 |
|     |          |         |            | C       | 2.8597  | -1.5744 | -0.0203 | 1488 | 1528 | 1556 | 1605 |
|     |          |         |            | C       | 1.4788  | -1.6001 | 0.0028  | 1618 | 1643 | 1651 | 3160 |
|     |          |         |            | H       | -1.2273 | 3.0035  | -0.1526 | 3161 | 3164 | 3170 | 3171 |
|     |          |         |            | H       | -4.6525 | -0.2761 | -0.0337 | 3181 | 3184 | 3187 | 3194 |
|     |          |         |            | H       | -3.3485 | 1.8240  | -0.1192 | 3207 |      |      |      |
|     |          |         |            | H       | -1.0276 | -2.5435 | 0.1194  |      |      |      |      |

|     |          |   |            |   |         |         |         |       |      |      |      |
|-----|----------|---|------------|---|---------|---------|---------|-------|------|------|------|
|     |          |   |            | H | -3.4621 | -2.4594 | 0.0915  |       |      |      |      |
|     |          |   |            | H | 1.2364  | 2.9919  | -0.1486 |       |      |      |      |
|     |          |   |            | H | 4.6301  | -0.3329 | -0.0638 |       |      |      |      |
|     |          |   |            | H | 3.4147  | -2.5057 | -0.0213 |       |      |      |      |
|     |          |   |            | H | 0.9789  | -2.5598 | 0.0155  |       |      |      |      |
|     |          |   |            | H | 0.8822  | 2.5434  | 1.8973  |       |      |      |      |
| TS7 | 0.194677 | A | 1062.12556 | C | 0.7115  | 0.1450  | -0.7335 | -199  | -5   | 21   | 43   |
|     |          | B | 6202.77873 | C | -0.1484 | -0.8868 | -0.5383 | 65    | 94   | 175  | 199  |
|     |          | C | 6576.38449 | C | -1.4914 | -0.5821 | -0.1570 | 232   | 328  | 369  | 388  |
|     |          |   |            | C | -1.8669 | 0.7910  | 0.0089  | 473   | 482  | 494  | 513  |
|     |          |   |            | C | -0.9000 | 1.8099  | -0.2091 | 561   | 615  | 623  | 650  |
|     |          |   |            | C | 0.3925  | 1.4972  | -0.5782 | 673   | 694  | 744  | 758  |
|     |          |   |            | H | -2.1772 | -2.6306 | -0.0610 | 766   | 790  | 807  | 848  |
|     |          |   |            | H | 0.1507  | -1.9234 | -0.6604 | 883   | 897  | 931  | 939  |
|     |          |   |            | C | -2.4638 | -1.5917 | 0.0649  | 957   | 970  | 991  | 996  |
|     |          |   |            | C | -3.2016 | 1.0913  | 0.3902  | 1037  | 1046 | 1110 | 1142 |
|     |          |   |            | H | -1.1937 | 2.8473  | -0.0788 | 1160  | 1172 | 1208 | 1250 |
|     |          |   |            | C | -4.1204 | 0.0905  | 0.5979  | 1276  | 1314 | 1339 | 1384 |
|     |          |   |            | C | -3.7472 | -1.2642 | 0.4335  | 1392  | 1440 | 1456 | 1464 |
|     |          |   |            | H | -3.4867 | 2.1308  | 0.5160  | 1527  | 1590 | 1613 | 1636 |
|     |          |   |            | H | -5.1356 | 0.3357  | 0.8887  | 1652  | 2111 | 3135 | 3147 |
|     |          |   |            | H | -4.4802 | -2.0459 | 0.6001  | 3150  | 3153 | 3157 | 3162 |
|     |          |   |            | C | 3.0535  | -0.4234 | -1.4291 | 3173  | 3174 | 3186 | 3238 |
|     |          |   |            | H | 2.6695  | -0.3956 | -2.4200 | 3456  |      |      |      |
|     |          |   |            | C | 3.7504  | -0.5120 | -0.4374 |       |      |      |      |
|     |          |   |            | C | 4.4702  | -0.6333 | 0.7735  |       |      |      |      |
|     |          |   |            | H | 4.4945  | -1.6274 | 1.2136  |       |      |      |      |
|     |          |   |            | C | 5.1078  | 0.3758  | 1.3880  |       |      |      |      |
|     |          |   |            | H | 5.1078  | 1.3798  | 0.9810  |       |      |      |      |
|     |          |   |            | H | 5.6428  | 0.2097  | 2.3149  |       |      |      |      |
|     |          |   |            | H | 1.1302  | 2.2754  | -0.7404 |       |      |      |      |
| TS8 | 0.193965 | A | 1098.41344 | C | -0.8731 | 1.0534  | -0.1298 | -1952 | 56   | 72   | 129  |
|     |          | B | 4830.22595 | C | -0.3072 | -0.2014 | -0.1587 | 145   | 170  | 218  | 286  |
|     |          | C | 5841.76477 | C | 1.0601  | -0.4593 | -0.0595 | 310   | 352  | 422  | 460  |
|     |          |   |            | C | 1.9156  | 0.7005  | 0.0524  | 491   | 500  | 519  | 533  |
|     |          |   |            | C | 1.3348  | 1.9951  | 0.0690  | 592   | 646  | 661  | 678  |
|     |          |   |            | C | -0.0299 | 2.1811  | -0.0177 | 753   | 757  | 760  | 789  |
|     |          |   |            | H | 1.0007  | -2.6199 | -0.1542 | 819   | 865  | 876  | 929  |
|     |          |   |            | H | -1.5640 | -0.8949 | -0.2749 | 935   | 958  | 971  | 973  |
|     |          |   |            | C | 1.6490  | -1.7551 | -0.0702 | 990   | 1000 | 1018 | 1035 |
|     |          |   |            | C | 3.3185  | 0.4964  | 0.1435  | 1038  | 1095 | 1140 | 1162 |
|     |          |   |            | H | 1.9925  | 2.8538  | 0.1556  | 1174  | 1185 | 1232 | 1258 |
|     |          |   |            | C | 3.8530  | -0.7688 | 0.1316  | 1305  | 1313 | 1367 | 1371 |
|     |          |   |            | C | 3.0097  | -1.9037 | 0.0253  | 1380  | 1436 | 1458 | 1481 |

|      |          |   |            |   |         |         |         |      |      |      |      |
|------|----------|---|------------|---|---------|---------|---------|------|------|------|------|
|      |          |   |            | H | 3.9662  | 1.3636  | 0.2249  | 1537 | 1582 | 1606 | 1618 |
|      |          |   |            | H | 4.9261  | -0.9054 | 0.2034  | 1651 | 1670 | 1728 | 3113 |
|      |          |   |            | H | 3.4482  | -2.8953 | 0.0176  | 3137 | 3155 | 3157 | 3159 |
|      |          |   |            | C | -2.3452 | 0.9752  | -0.2129 | 3166 | 3174 | 3179 | 3189 |
|      |          |   |            | H | -2.9894 | 1.8487  | -0.2484 | 3227 |      |      |      |
|      |          |   |            | C | -2.7780 | -0.2876 | -0.2706 |      |      |      |      |
|      |          |   |            | C | -4.0270 | -0.9866 | -0.2806 |      |      |      |      |
|      |          |   |            | H | -4.1633 | -1.7292 | -1.0658 |      |      |      |      |
|      |          |   |            | C | -5.0041 | -0.8214 | 0.6304  |      |      |      |      |
|      |          |   |            | H | -4.8956 | -0.1266 | 1.4555  |      |      |      |      |
|      |          |   |            | H | -5.9290 | -1.3832 | 0.5672  |      |      |      |      |
|      |          |   |            | H | -0.4500 | 3.1815  | 0.0072  |      |      |      |      |
| TS9  | 0.195035 | A | 1196.09194 | C | -1.0597 | 0.8814  | -0.2986 | -487 | 57   | 66   | 94   |
|      |          | B | 4531.10693 | C | -0.3221 | -0.2985 | -0.3987 | 142  | 186  | 240  | 266  |
|      |          | C | 5319.35802 | C | 1.0483  | -0.4598 | -0.2082 | 327  | 389  | 415  | 431  |
|      |          |   |            | C | 1.7860  | 0.7313  | 0.1327  | 496  | 508  | 513  | 524  |
|      |          |   |            | C | 1.0732  | 1.9704  | 0.2453  | 578  | 619  | 624  | 653  |
|      |          |   |            | C | -0.2710 | 2.0532  | 0.0425  | 722  | 748  | 755  | 761  |
|      |          |   |            | H | 1.1820  | -2.5848 | -0.5822 | 769  | 817  | 818  | 869  |
|      |          |   |            | H | -3.4217 | -0.4090 | -1.9402 | 919  | 956  | 960  | 971  |
|      |          |   |            | C | 1.7426  | -1.6936 | -0.3259 | 988  | 988  | 993  | 1038 |
|      |          |   |            | C | 3.1763  | 0.6281  | 0.3396  | 1041 | 1131 | 1159 | 1162 |
|      |          |   |            | H | 1.6359  | 2.8626  | 0.4998  | 1169 | 1189 | 1228 | 1236 |
|      |          |   |            | C | 3.8255  | -0.5858 | 0.2189  | 1266 | 1327 | 1344 | 1387 |
|      |          |   |            | C | 3.1024  | -1.7506 | -0.1159 | 1404 | 1427 | 1433 | 1444 |
|      |          |   |            | H | 3.7352  | 1.5224  | 0.5968  | 1454 | 1509 | 1520 | 1556 |
|      |          |   |            | H | 4.8955  | -0.6462 | 0.3815  | 1607 | 1629 | 3100 | 3107 |
|      |          |   |            | H | 3.6237  | -2.6968 | -0.2075 | 3136 | 3145 | 3153 | 3157 |
|      |          |   |            | C | -2.4417 | 0.9427  | -0.5159 | 3169 | 3172 | 3182 | 3192 |
|      |          |   |            | H | -2.9299 | 1.9147  | -0.4556 | 3238 |      |      |      |
|      |          |   |            | C | -3.2541 | -0.2274 | -0.8789 |      |      |      |      |
|      |          |   |            | C | -3.8841 | -1.0785 | 0.0307  |      |      |      |      |
|      |          |   |            | H | -4.4718 | -1.8892 | -0.3942 |      |      |      |      |
|      |          |   |            | C | -3.8303 | -0.9787 | 1.4054  |      |      |      |      |
|      |          |   |            | H | -3.2582 | -0.1987 | 1.8936  |      |      |      |      |
|      |          |   |            | H | -4.3549 | -1.6849 | 2.0363  |      |      |      |      |
|      |          |   |            | H | -0.7831 | 3.0060  | 0.1330  |      |      |      |      |
| TS11 | 0.195009 | A | 1145.00867 | C | 1.3959  | 0.8992  | 0.0132  | -627 | 96   | 99   | 223  |
|      |          | B | 3292.65329 | C | 0.7127  | -0.3470 | -0.0187 | 224  | 245  | 283  | 351  |
|      |          | C | 4410.69391 | C | -0.7386 | -0.3623 | -0.0187 | 408  | 413  | 447  | 457  |
|      |          |   |            | C | -1.4446 | 0.8759  | -0.0057 | 504  | 508  | 553  | 556  |
|      |          |   |            | C | -0.7135 | 2.1085  | 0.0221  | 599  | 630  | 719  | 724  |
|      |          |   |            | C | 0.6440  | 2.1200  | 0.0359  | 726  | 747  | 774  | 798  |
|      |          |   |            | H | -0.9932 | -2.5150 | -0.0153 | 832  | 842  | 873  | 885  |

|      |          |   |            |   |         |         |         |       |      |      |      |
|------|----------|---|------------|---|---------|---------|---------|-------|------|------|------|
|      |          |   |            | H | 4.6296  | -0.2045 | -0.0922 | 893   | 960  | 973  | 983  |
|      |          |   |            | C | -1.4955 | -1.5566 | -0.0224 | 992   | 999  | 1014 | 1059 |
|      |          |   |            | C | -2.8577 | 0.8734  | -0.0128 | 1061  | 1109 | 1160 | 1172 |
|      |          |   |            | H | -1.2717 | 3.0388  | 0.0356  | 1184  | 1187 | 1221 | 1240 |
|      |          |   |            | C | -3.5669 | -0.3087 | -0.0247 | 1261  | 1300 | 1327 | 1364 |
|      |          |   |            | C | -2.8759 | -1.5332 | -0.0260 | 1372  | 1440 | 1444 | 1465 |
|      |          |   |            | H | -3.3797 | 1.8247  | -0.0057 | 1485  | 1530 | 1554 | 1597 |
|      |          |   |            | H | -4.6509 | -0.2966 | -0.0288 | 1625  | 1646 | 1655 | 3156 |
|      |          |   |            | H | -3.4292 | -2.4656 | -0.0275 | 3160  | 3162 | 3170 | 3174 |
|      |          |   |            | C | 2.8101  | 0.9242  | 0.0022  | 3176  | 3185 | 3188 | 3196 |
|      |          |   |            | H | 3.3126  | 1.8854  | 0.0292  | 3208  |      |      |      |
|      |          |   |            | C | 3.5467  | -0.2432 | -0.0623 |       |      |      |      |
|      |          |   |            | C | 2.8877  | -1.4768 | -0.1008 |       |      |      |      |
|      |          |   |            | H | 3.4572  | -2.3970 | -0.1600 |       |      |      |      |
|      |          |   |            | C | 1.4964  | -1.5364 | -0.0288 |       |      |      |      |
|      |          |   |            | H | 1.3190  | -2.0577 | 1.8649  |       |      |      |      |
|      |          |   |            | H | 1.0157  | -2.4940 | -0.1753 |       |      |      |      |
|      |          |   |            | H | 1.1866  | 3.0592  | 0.0603  |       |      |      |      |
| TS14 | 0.224210 | A | 2166.16631 | C | -3.6370 | 0.7904  | -0.0369 | -1049 | 63   | 99   | 123  |
|      |          | B | 3586.53199 | C | -3.2261 | -0.5129 | -0.2239 | 152   | 186  | 225  | 256  |
|      |          | C | 5647.20827 | C | -1.8629 | -0.8758 | -0.1454 | 262   | 297  | 349  | 395  |
|      |          |   |            | C | -0.8600 | 0.1296  | 0.0579  | 410   | 421  | 480  | 493  |
|      |          |   |            | C | -1.3592 | 1.4136  | 0.3320  | 513   | 514  | 540  | 576  |
|      |          |   |            | C | -2.6824 | 1.7695  | 0.2985  | 581   | 612  | 672  | 690  |
|      |          |   |            | C | -1.4766 | -2.2545 | -0.1952 | 721   | 736  | 763  | 777  |
|      |          |   |            | C | 0.5488  | -0.2479 | 0.0242  | 799   | 816  | 840  | 846  |
|      |          |   |            | C | 0.8608  | -1.6401 | 0.0913  | 895   | 920  | 935  | 956  |
|      |          |   |            | C | -0.1832 | -2.6185 | -0.0171 | 973   | 977  | 981  | 987  |
|      |          |   |            | C | 2.2004  | -2.0639 | 0.2059  | 1010  | 1028 | 1049 | 1056 |
|      |          |   |            | H | 2.4083  | -3.1260 | 0.2792  | 1107  | 1116 | 1143 | 1173 |
|      |          |   |            | C | 3.2286  | -1.1460 | 0.1900  | 1191  | 1196 | 1226 | 1250 |
|      |          |   |            | C | 2.9391  | 0.2069  | -0.0104 | 1275  | 1295 | 1329 | 1341 |
|      |          |   |            | C | 1.6311  | 0.6805  | -0.1108 | 1352  | 1406 | 1422 | 1446 |
|      |          |   |            | H | -2.2500 | -3.0031 | -0.3313 | 1450  | 1468 | 1518 | 1522 |
|      |          |   |            | H | -4.6878 | 1.0520  | -0.0949 | 1584  | 1622 | 1637 | 1651 |
|      |          |   |            | H | -3.9569 | -1.2931 | -0.4083 | 1677  | 2122 | 3136 | 3147 |
|      |          |   |            | H | -0.6241 | 2.4061  | 1.0622  | 3157  | 3159 | 3163 | 3167 |
|      |          |   |            | H | -2.9903 | 2.7773  | 0.5568  | 3176  | 3179 | 3182 | 3193 |
|      |          |   |            | H | 0.0958  | -3.6666 | 0.0065  | 3219  |      |      |      |
|      |          |   |            | H | 4.2594  | -1.4722 | 0.2694  |       |      |      |      |
|      |          |   |            | H | 3.7552  | 0.9049  | -0.1517 |       |      |      |      |
|      |          |   |            | C | 1.4260  | 2.0884  | -0.5036 |       |      |      |      |
|      |          |   |            | H | 0.5485  | 2.2809  | -1.1140 |       |      |      |      |
|      |          |   |            | C | 2.2293  | 3.1144  | -0.2095 |       |      |      |      |

|      |          |   |            |   |         |         |         |      |      |      |      |
|------|----------|---|------------|---|---------|---------|---------|------|------|------|------|
|      |          |   |            | H | 3.0932  | 3.0105  | 0.4382  |      |      |      |      |
|      |          |   |            | H | 2.0273  | 4.1065  | -0.5954 |      |      |      |      |
|      |          |   |            | H | -0.3368 | 3.0201  | 1.6014  |      |      |      |      |
| TS15 | 0.212331 | A | 1970.83548 | C | -3.5029 | -0.3570 | -0.0993 | -238 | 71   | 107  | 154  |
|      |          | B | 3378.37695 | C | -2.6954 | -1.4641 | 0.0481  | 204  | 221  | 251  | 300  |
|      |          | C | 5276.43851 | C | -1.2901 | -1.3336 | 0.0830  | 386  | 405  | 432  | 455  |
|      |          |   |            | C | -0.6850 | -0.0434 | 0.0143  | 486  | 499  | 507  | 554  |
|      |          |   |            | C | -1.5431 | 1.0958  | -0.1065 | 563  | 571  | 622  | 636  |
|      |          |   |            | C | -2.9205 | 0.9122  | -0.1938 | 691  | 721  | 732  | 758  |
|      |          |   |            | C | -0.4716 | -2.5106 | 0.1467  | 772  | 801  | 808  | 839  |
|      |          |   |            | C | 0.7731  | 0.0316  | -0.0206 | 841  | 891  | 919  | 939  |
|      |          |   |            | C | 1.5477  | -1.1737 | -0.0027 | 968  | 971  | 974  | 980  |
|      |          |   |            | C | 0.8816  | -2.4378 | 0.0962  | 986  | 1006 | 1061 | 1074 |
|      |          |   |            | C | 2.9592  | -1.1029 | -0.0680 | 1110 | 1148 | 1172 | 1190 |
|      |          |   |            | H | 3.5231  | -2.0296 | -0.0533 | 1193 | 1224 | 1254 | 1256 |
|      |          |   |            | C | 3.6189  | 0.1060  | -0.1447 | 1297 | 1305 | 1342 | 1350 |
|      |          |   |            | C | 2.8748  | 1.3080  | -0.1454 | 1403 | 1422 | 1439 | 1455 |
|      |          |   |            | C | 1.5145  | 1.2146  | -0.0854 | 1468 | 1507 | 1522 | 1581 |
|      |          |   |            | C | -0.0461 | 2.9625  | 0.5906  | 1614 | 1631 | 1642 | 1651 |
|      |          |   |            | C | -1.0226 | 2.4687  | -0.1952 | 3133 | 3145 | 3151 | 3155 |
|      |          |   |            | H | -1.4281 | 3.0894  | -0.9905 | 3160 | 3161 | 3167 | 3174 |
|      |          |   |            | H | 0.3416  | 3.9629  | 0.4335  | 3177 | 3186 | 3227 |      |
|      |          |   |            | H | -0.9676 | -3.4730 | 0.2156  |      |      |      |      |
|      |          |   |            | H | -4.5807 | -0.4636 | -0.1464 |      |      |      |      |
|      |          |   |            | H | -3.1282 | -2.4566 | 0.1139  |      |      |      |      |
|      |          |   |            | H | -3.5541 | 1.7845  | -0.3156 |      |      |      |      |
|      |          |   |            | H | 1.4847  | -3.3395 | 0.1281  |      |      |      |      |
|      |          |   |            | H | 4.7023  | 0.1388  | -0.1953 |      |      |      |      |
|      |          |   |            | H | 3.3808  | 2.2671  | -0.1899 |      |      |      |      |
|      |          |   |            | H | 0.2703  | 2.4613  | 1.4959  |      |      |      |      |
| TS16 | 0.207579 | A | 1827.13716 | C | 3.5292  | 0.0089  | -0.0212 | -629 | 96   | 147  | 196  |
|      |          | B | 3264.93038 | C | 2.8286  | 1.2107  | -0.0524 | 237  | 251  | 299  | 346  |
|      |          | C | 5063.68577 | C | 1.4245  | 1.2234  | -0.0417 | 358  | 410  | 420  | 461  |
|      |          |   |            | C | 0.7204  | -0.0189 | -0.0027 | 498  | 506  | 508  | 516  |
|      |          |   |            | C | 1.4470  | -1.2446 | 0.0230  | 550  | 554  | 582  | 594  |
|      |          |   |            | C | 2.8502  | -1.2055 | 0.0165  | 685  | 703  | 723  | 748  |
|      |          |   |            | C | 0.6719  | 2.4386  | -0.0779 | 762  | 772  | 813  | 814  |
|      |          |   |            | C | -0.7063 | -0.0336 | -0.0059 | 826  | 832  | 862  | 906  |
|      |          |   |            | C | -1.4363 | 1.1892  | -0.0290 | 919  | 977  | 979  | 984  |
|      |          |   |            | C | -0.6998 | 2.4335  | -0.0133 | 988  | 997  | 1014 | 1090 |
|      |          |   |            | C | -2.8348 | 1.1497  | -0.0553 | 1113 | 1124 | 1157 | 1166 |
|      |          |   |            | H | -3.3916 | 2.0806  | -0.0685 | 1197 | 1203 | 1227 | 1258 |
|      |          |   |            | C | -3.5119 | -0.0679 | -0.0545 | 1262 | 1265 | 1342 | 1349 |
|      |          |   |            | C | -2.8091 | -1.2677 | -0.0225 | 1396 | 1418 | 1431 | 1456 |

|      |          |   |            |   |         |         |         |       |      |      |      |
|------|----------|---|------------|---|---------|---------|---------|-------|------|------|------|
|      |          |   |            | C | -1.4062 | -1.2764 | 0.0016  | 1458  | 1478 | 1503 | 1531 |
|      |          |   |            | C | -0.6456 | -2.4944 | 0.0332  | 1581  | 1619 | 1625 | 1632 |
|      |          |   |            | C | 0.7134  | -2.4795 | 0.0462  | 1659  | 3157 | 3160 | 3160 |
|      |          |   |            | H | 1.2713  | -3.4098 | 0.0694  | 3164  | 3168 | 3169 | 3176 |
|      |          |   |            | H | -1.1829 | -3.4370 | 0.0454  | 3181  | 3185 | 3185 |      |
|      |          |   |            | H | 1.2084  | 3.3804  | -0.1207 |       |      |      |      |
|      |          |   |            | H | 4.6134  | 0.0185  | -0.0268 |       |      |      |      |
|      |          |   |            | H | 3.3655  | 2.1529  | -0.0831 |       |      |      |      |
|      |          |   |            | H | 3.4049  | -2.1376 | 0.0379  |       |      |      |      |
|      |          |   |            | H | -0.9088 | 2.8926  | 1.9121  |       |      |      |      |
|      |          |   |            | H | -4.5958 | -0.0796 | -0.0748 |       |      |      |      |
|      |          |   |            | H | -3.3443 | -2.2114 | -0.0167 |       |      |      |      |
|      |          |   |            | H | -1.2519 | 3.3577  | -0.1391 |       |      |      |      |
| TS17 | 0.203719 | A | 2087.36762 | C | 0.9892  | -0.4593 | -0.7443 | -192  | 9    | 20   | 42   |
|      |          | B | 6530.46861 | C | 0.0224  | 0.4730  | -0.5434 | 57    | 92   | 110  | 142  |
|      |          | C | 7840.18963 | C | -1.2715 | 0.0243  | -0.1438 | 177   | 210  | 231  | 329  |
|      |          |   |            | C | -1.4881 | -1.3807 | 0.0324  | 357   | 362  | 437  | 441  |
|      |          |   |            | C | -0.4164 | -2.2873 | -0.1940 | 480   | 490  | 530  | 562  |
|      |          |   |            | C | 0.8286  | -1.8367 | -0.5801 | 571   | 588  | 631  | 644  |
|      |          |   |            | H | 0.2003  | 1.5347  | -0.6730 | 650   | 675  | 694  | 696  |
|      |          |   |            | C | -2.3628 | 0.9273  | 0.0905  | 700   | 747  | 774  | 787  |
|      |          |   |            | C | -2.7697 | -1.8399 | 0.4316  | 827   | 860  | 873  | 898  |
|      |          |   |            | H | -0.5947 | -3.3495 | -0.0559 | 926   | 942  | 961  | 985  |
|      |          |   |            | H | 1.6469  | -2.5275 | -0.7495 | 997   | 1024 | 1054 | 1093 |
|      |          |   |            | C | -3.7995 | -0.9557 | 0.6499  | 1111  | 1151 | 1190 | 1218 |
|      |          |   |            | C | -3.5968 | 0.4273  | 0.4796  | 1241  | 1278 | 1315 | 1327 |
|      |          |   |            | H | -2.9249 | -2.9057 | 0.5625  | 1359  | 1386 | 1440 | 1446 |
|      |          |   |            | H | -4.7750 | -1.3166 | 0.9546  | 1469  | 1513 | 1593 | 1609 |
|      |          |   |            | H | -4.4127 | 1.1185  | 0.6532  | 1635  | 1637 | 2114 | 2194 |
|      |          |   |            | C | -2.1888 | 2.3336  | -0.0740 | 3135  | 3148 | 3153 | 3163 |
|      |          |   |            | C | -2.0482 | 3.5231  | -0.2117 | 3172  | 3176 | 3180 | 3194 |
|      |          |   |            | H | -1.9289 | 4.5721  | -0.3312 | 3239  | 3456 | 3475 |      |
|      |          |   |            | C | 3.2653  | 0.3611  | -1.4292 |       |      |      |      |
|      |          |   |            | H | 2.7956  | 0.6170  | -2.3480 |       |      |      |      |
|      |          |   |            | C | 4.0360  | 0.1942  | -0.5049 |       |      |      |      |
|      |          |   |            | C | 4.8687  | -0.0684 | 0.6074  |       |      |      |      |
|      |          |   |            | H | 5.4289  | -0.9999 | 0.5738  |       |      |      |      |
|      |          |   |            | C | 5.0046  | 0.7458  | 1.6661  |       |      |      |      |
|      |          |   |            | H | 4.4629  | 1.6814  | 1.7358  |       |      |      |      |
|      |          |   |            | H | 5.6637  | 0.4843  | 2.4847  |       |      |      |      |
| TS18 | 0.202777 | A | 2058.59861 | C | -0.9494 | -1.4321 | -0.1456 | -1956 | 44   | 59   | 99   |
|      |          | B | 4855.54177 | C | -0.3547 | -0.1888 | -0.1343 | 112   | 146  | 156  | 179  |
|      |          | C | 6824.05807 | C | 1.0160  | 0.0318  | -0.0287 | 221   | 285  | 304  | 339  |
|      |          |   |            | C | 1.8444  | -1.1490 | 0.0449  | 387   | 437  | 452  | 470  |



|      |          |   |            |   |         |         |         |      |      |      |      |
|------|----------|---|------------|---|---------|---------|---------|------|------|------|------|
|      |          |   |            | C | 1.2334  | -2.4297 | 0.0217  | 506  | 525  | 534  | 588  |
|      |          |   |            | C | -0.1348 | -2.5822 | -0.0695 | 588  | 594  | 632  | 669  |
|      |          |   |            | H | -1.5898 | 0.5381  | -0.2286 | 681  | 691  | 736  | 745  |
|      |          |   |            | C | 1.6397  | 1.3270  | 0.0003  | 757  | 781  | 831  | 874  |
|      |          |   |            | C | 3.2513  | -0.9913 | 0.1401  | 884  | 925  | 930  | 961  |
|      |          |   |            | H | 1.8725  | -3.3043 | 0.0803  | 963  | 981  | 999  | 1003 |
|      |          |   |            | H | -0.5777 | -3.5729 | -0.0762 | 1038 | 1055 | 1088 | 1098 |
|      |          |   |            | C | 3.8217  | 0.2588  | 0.1668  | 1159 | 1182 | 1190 | 1238 |
|      |          |   |            | C | 3.0176  | 1.4166  | 0.0983  | 1253 | 1292 | 1311 | 1346 |
|      |          |   |            | H | 3.8729  | -1.8792 | 0.1934  | 1364 | 1394 | 1435 | 1451 |
|      |          |   |            | H | 4.8978  | 0.3654  | 0.2408  | 1463 | 1532 | 1582 | 1606 |
|      |          |   |            | H | 3.4805  | 2.3957  | 0.1211  | 1614 | 1635 | 1668 | 1731 |
|      |          |   |            | C | 0.8428  | 2.5066  | -0.0693 | 2196 | 3115 | 3137 | 3157 |
|      |          |   |            | C | 0.1777  | 3.5103  | -0.1278 | 3160 | 3161 | 3176 | 3179 |
|      |          |   |            | H | -0.4089 | 4.3947  | -0.1772 | 3194 | 3227 | 3476 |      |
|      |          |   |            | C | -2.4185 | -1.3148 | -0.2284 |      |      |      |      |
|      |          |   |            | H | -3.0847 | -2.1698 | -0.2924 |      |      |      |      |
|      |          |   |            | C | -2.8153 | -0.0388 | -0.2466 |      |      |      |      |
|      |          |   |            | C | -4.0448 | 0.6937  | -0.2393 |      |      |      |      |
|      |          |   |            | H | -4.1544 | 1.4667  | -0.9987 |      |      |      |      |
|      |          |   |            | C | -5.0309 | 0.5240  | 0.6609  |      |      |      |      |
|      |          |   |            | H | -4.9458 | -0.2011 | 1.4623  |      |      |      |      |
|      |          |   |            | H | -5.9391 | 1.1138  | 0.6139  |      |      |      |      |
| TS19 | 0.208177 | A | 2192.56852 | C | -1.4364 | -1.1783 | -0.1892 | -275 | 36   | 82   | 127  |
|      |          | B | 3756.43505 | C | -0.6267 | -0.0659 | -0.1205 | 137  | 178  | 197  | 208  |
|      |          | C | 5870.12516 | C | 0.7756  | -0.0840 | -0.0352 | 289  | 327  | 370  | 402  |
|      |          |   |            | C | 1.4016  | -1.3801 | 0.0341  | 407  | 450  | 478  | 489  |
|      |          |   |            | C | 0.5845  | -2.5419 | -0.0338 | 513  | 542  | 575  | 589  |
|      |          |   |            | C | -0.7745 | -2.4502 | -0.1485 | 611  | 633  | 675  | 681  |
|      |          |   |            | C | 1.6209  | 1.0787  | -0.0157 | 697  | 708  | 752  | 765  |
|      |          |   |            | C | 2.8079  | -1.4742 | 0.1572  | 798  | 802  | 834  | 843  |
|      |          |   |            | H | 1.0639  | -3.5142 | 0.0036  | 911  | 925  | 933  | 964  |
|      |          |   |            | H | -1.3777 | -3.3512 | -0.2046 | 965  | 982  | 984  | 996  |
|      |          |   |            | C | 3.5897  | -0.3431 | 0.1968  | 1039 | 1082 | 1095 | 1171 |
|      |          |   |            | C | 2.9966  | 0.9279  | 0.1033  | 1173 | 1195 | 1225 | 1243 |
|      |          |   |            | H | 3.2605  | -2.4585 | 0.2200  | 1259 | 1286 | 1316 | 1352 |
|      |          |   |            | H | 4.6663  | -0.4236 | 0.2925  | 1380 | 1423 | 1445 | 1458 |
|      |          |   |            | H | 3.6174  | 1.8154  | 0.1182  | 1474 | 1509 | 1552 | 1582 |
|      |          |   |            | C | 1.1003  | 2.4007  | -0.1371 | 1612 | 1622 | 1649 | 2193 |
|      |          |   |            | C | 0.7458  | 3.5471  | -0.2526 | 3123 | 3134 | 3151 | 3155 |
|      |          |   |            | H | 0.4204  | 4.5532  | -0.3565 | 3158 | 3161 | 3175 | 3180 |
|      |          |   |            | C | -2.8967 | -1.1755 | -0.2268 | 3195 | 3248 | 3474 |      |
|      |          |   |            | H | -3.3487 | -2.1396 | -0.4427 |      |      |      |      |
|      |          |   |            | C | -3.7233 | -0.1677 | 0.1516  |      |      |      |      |

|      |          |   |            |   |         |         |         |       |      |      |      |
|------|----------|---|------------|---|---------|---------|---------|-------|------|------|------|
|      |          |   |            | C | -3.2644 | 1.1450  | 0.5287  |       |      |      |      |
|      |          |   |            | H | -3.7245 | 1.6058  | 1.4007  |       |      |      |      |
|      |          |   |            | C | -2.2375 | 1.7769  | -0.0956 |       |      |      |      |
|      |          |   |            | H | -1.9513 | 1.5196  | -1.1062 |       |      |      |      |
|      |          |   |            | H | -1.8291 | 2.6998  | 0.2932  |       |      |      |      |
|      |          |   |            | H | -4.7775 | -0.3995 | 0.2826  |       |      |      |      |
| TS20 | 0.206248 | A | 2131.69932 | C | -3.5412 | 0.4710  | -0.1917 | -1991 | 70   | 121  | 159  |
|      |          | B | 3307.37061 | C | -3.0376 | -0.8276 | -0.2818 | 204   | 225  | 264  | 303  |
|      |          | C | 5353.83143 | C | -1.6616 | -1.0862 | -0.0607 | 338   | 378  | 415  | 444  |
|      |          |   |            | C | -0.8023 | -0.0102 | 0.2470  | 492   | 500  | 512  | 521  |
|      |          |   |            | C | -1.3474 | 1.3163  | 0.5087  | 551   | 561  | 580  | 596  |
|      |          |   |            | C | -2.7402 | 1.5198  | 0.2384  | 625   | 651  | 699  | 712  |
|      |          |   |            | C | -1.1002 | -2.4039 | -0.1507 | 730   | 738  | 771  | 788  |
|      |          |   |            | C | 0.6120  | -0.1845 | 0.1747  | 808   | 833  | 858  | 863  |
|      |          |   |            | C | 1.1478  | -1.5056 | 0.0999  | 923   | 965  | 972  | 977  |
|      |          |   |            | C | 0.2393  | -2.6083 | -0.0154 | 985   | 988  | 1007 | 1047 |
|      |          |   |            | C | 2.5439  | -1.6815 | 0.0640  | 1095  | 1120 | 1157 | 1171 |
|      |          |   |            | H | 2.9490  | -2.6877 | 0.0434  | 1190  | 1212 | 1227 | 1248 |
|      |          |   |            | C | 3.3886  | -0.5858 | 0.0147  | 1264  | 1310 | 1337 | 1340 |
|      |          |   |            | C | 2.8642  | 0.7105  | -0.0511 | 1362  | 1402 | 1415 | 1439 |
|      |          |   |            | C | 1.4904  | 0.9341  | 0.0266  | 1452  | 1479 | 1516 | 1531 |
|      |          |   |            | H | -1.7685 | -3.2412 | -0.3231 | 1562  | 1586 | 1617 | 1638 |
|      |          |   |            | H | -4.5927 | 0.6489  | -0.3903 | 1850  | 3045 | 3158 | 3160 |
|      |          |   |            | H | -3.6961 | -1.6514 | -0.5342 | 3163  | 3173 | 3177 | 3179 |
|      |          |   |            | H | -0.9780 | 1.8194  | 1.4057  | 3184  | 3192 | 3371 |      |
|      |          |   |            | H | -3.1801 | 2.4911  | 0.4356  |       |      |      |      |
|      |          |   |            | H | 0.6484  | -3.6123 | -0.0575 |       |      |      |      |
|      |          |   |            | H | 4.4629  | -0.7286 | -0.0150 |       |      |      |      |
|      |          |   |            | H | 3.5232  | 1.5606  | -0.1801 |       |      |      |      |
|      |          |   |            | H | -0.4149 | 2.0653  | -0.2001 |       |      |      |      |
|      |          |   |            | C | 0.9588  | 2.2742  | -0.2066 |       |      |      |      |
|      |          |   |            | C | 1.3113  | 3.4739  | -0.3527 |       |      |      |      |
|      |          |   |            | H | 1.0929  | 4.4992  | -0.5639 |       |      |      |      |
| TS21 | 0.211518 | A | 1906.44019 | C | -3.5651 | 0.0378  | 0.0260  | -352  | 93   | 132  | 163  |
|      |          | B | 3375.99994 | C | -2.8776 | -1.1272 | -0.2706 | 221   | 226  | 278  | 300  |
|      |          | C | 5123.53423 | C | -1.4672 | -1.1837 | -0.1645 | 389   | 414  | 434  | 477  |
|      |          |   |            | C | -0.7443 | -0.0089 | 0.1703  | 495   | 504  | 513  | 550  |
|      |          |   |            | C | -1.4773 | 1.1457  | 0.5885  | 574   | 594  | 603  | 658  |
|      |          |   |            | C | -2.8751 | 1.1533  | 0.5113  | 673   | 720  | 727  | 757  |
|      |          |   |            | C | -0.7548 | -2.4194 | -0.3103 | 772   | 779  | 810  | 831  |
|      |          |   |            | C | 0.6972  | -0.0232 | 0.1200  | 838   | 870  | 876  | 890  |
|      |          |   |            | C | 1.3611  | -1.2837 | 0.0841  | 917   | 920  | 972  | 977  |
|      |          |   |            | C | 0.5893  | -2.4761 | -0.1159 | 983   | 1008 | 1038 | 1062 |
|      |          |   |            | C | 2.7693  | -1.3381 | 0.1736  | 1105  | 1139 | 1168 | 1175 |

|      |          |   |            |   |         |         |         |       |      |      |      |
|------|----------|---|------------|---|---------|---------|---------|-------|------|------|------|
|      |          |   |            | H | 3.2579  | -2.3066 | 0.1851  | 1189  | 1222 | 1223 | 1246 |
|      |          |   |            | C | 3.5133  | -0.1772 | 0.2110  | 1258  | 1284 | 1331 | 1346 |
|      |          |   |            | C | 2.8717  | 1.0613  | 0.0703  | 1365  | 1415 | 1438 | 1458 |
|      |          |   |            | C | 1.4852  | 1.1658  | -0.0065 | 1465  | 1518 | 1535 | 1581 |
|      |          |   |            | H | -1.3186 | -3.3196 | -0.5313 | 1605  | 1619 | 1640 | 1645 |
|      |          |   |            | H | -4.6466 | 0.0627  | -0.0507 | 3038  | 3157 | 3159 | 3160 |
|      |          |   |            | H | -3.4169 | -2.0227 | -0.5605 | 3166  | 3170 | 3176 | 3180 |
|      |          |   |            | H | -0.9982 | 1.8446  | 1.2601  | 3185  | 3188 | 3219 |      |
|      |          |   |            | H | -3.4243 | 2.0175  | 0.8677  |       |      |      |      |
|      |          |   |            | H | 1.1124  | -3.4255 | -0.1608 |       |      |      |      |
|      |          |   |            | H | 4.5942  | -0.2200 | 0.2819  |       |      |      |      |
|      |          |   |            | H | 3.4695  | 1.9612  | -0.0319 |       |      |      |      |
|      |          |   |            | C | 0.9212  | 2.4605  | -0.4389 |       |      |      |      |
|      |          |   |            | C | -0.3538 | 2.7728  | -0.5792 |       |      |      |      |
|      |          |   |            | H | -0.8641 | 3.6627  | -0.9208 |       |      |      |      |
|      |          |   |            | H | 1.6763  | 3.1875  | -0.7543 |       |      |      |      |
| TS22 | 0.208065 | A | 1807.55685 | C | -3.5332 | -0.0240 | -0.0231 | -1015 | 95   | 148  | 208  |
|      |          | B | 3269.55111 | C | -2.8595 | 1.1913  | -0.0016 | 236   | 262  | 350  | 395  |
|      |          | C | 5048.17056 | C | -1.4559 | 1.2335  | 0.0128  | 403   | 441  | 459  | 493  |
|      |          |   |            | C | -0.7266 | 0.0070  | 0.0164  | 503   | 505  | 519  | 534  |
|      |          |   |            | C | -1.4279 | -1.2362 | -0.0214 | 545   | 561  | 584  | 596  |
|      |          |   |            | C | -2.8267 | -1.2268 | -0.0389 | 688   | 698  | 721  | 747  |
|      |          |   |            | C | -0.7229 | 2.4670  | 0.0173  | 750   | 774  | 809  | 812  |
|      |          |   |            | C | 0.6945  | 0.0271  | 0.0298  | 828   | 838  | 859  | 899  |
|      |          |   |            | C | 1.3961  | 1.2626  | 0.0026  | 914   | 975  | 976  | 982  |
|      |          |   |            | C | 0.6371  | 2.4814  | 0.0043  | 984   | 990  | 1010 | 1089 |
|      |          |   |            | C | 2.8012  | 1.2517  | -0.0481 | 1112  | 1122 | 1164 | 1167 |
|      |          |   |            | H | 3.3360  | 2.1950  | -0.0740 | 1194  | 1202 | 1221 | 1250 |
|      |          |   |            | C | 3.5062  | 0.0488  | -0.1109 | 1261  | 1265 | 1334 | 1345 |
|      |          |   |            | C | 2.8426  | -1.1659 | -0.0611 | 1389  | 1425 | 1430 | 1447 |
|      |          |   |            | C | 1.4315  | -1.2119 | 0.1195  | 1455  | 1472 | 1511 | 1524 |
|      |          |   |            | C | 0.6864  | -2.4533 | -0.0209 | 1583  | 1609 | 1621 | 1640 |
|      |          |   |            | C | -0.6654 | -2.4586 | -0.0723 | 1665  | 3157 | 3159 | 3161 |
|      |          |   |            | H | -1.2048 | -3.3960 | -0.1591 | 3162  | 3168 | 3172 | 3176 |
|      |          |   |            | H | 1.2464  | -3.3816 | -0.0542 | 3179  | 3185 | 3186 |      |
|      |          |   |            | H | -1.2800 | 3.3981  | 0.0215  |       |      |      |      |
|      |          |   |            | H | -4.6172 | -0.0383 | -0.0347 |       |      |      |      |
|      |          |   |            | H | -3.4165 | 2.1223  | 0.0005  |       |      |      |      |
|      |          |   |            | H | -3.3626 | -2.1697 | -0.0690 |       |      |      |      |
|      |          |   |            | H | 1.1748  | 3.4238  | -0.0060 |       |      |      |      |
|      |          |   |            | H | 4.5863  | 0.0663  | -0.2044 |       |      |      |      |
|      |          |   |            | H | 3.3953  | -2.0979 | -0.1008 |       |      |      |      |
|      |          |   |            | H | 1.4770  | -1.2840 | 1.8538  |       |      |      |      |
| TS23 | 0.204130 | A | 2113.11016 | C | -0.9851 | -1.4892 | -0.1654 | -273  | 11   | 27   | 51   |

|      |          |   |            |   |         |         |         |       |      |      |      |
|------|----------|---|------------|---|---------|---------|---------|-------|------|------|------|
|      |          | B | 5190.55442 | C | -0.3695 | -0.2771 | -0.1114 | 98    | 119  | 144  | 164  |
|      |          | C | 7202.28323 | C | 1.0258  | -0.0929 | -0.0266 | 174   | 203  | 233  | 341  |
|      |          |   |            | C | 1.8187  | -1.2991 | 0.0073  | 360   | 368  | 439  | 458  |
|      |          |   |            | C | 1.1761  | -2.5638 | -0.0492 | 483   | 485  | 543  | 559  |
|      |          |   |            | C | -0.1898 | -2.6630 | -0.1351 | 577   | 591  | 627  | 639  |
|      |          |   |            | C | 1.7138  | 1.1680  | 0.0262  | 641   | 685  | 704  | 710  |
|      |          |   |            | C | 3.2309  | -1.2062 | 0.0965  | 745   | 753  | 760  | 799  |
|      |          |   |            | H | 1.7916  | -3.4566 | -0.0230 | 816   | 865  | 900  | 902  |
|      |          |   |            | H | -0.6698 | -3.6350 | -0.1777 | 927   | 933  | 976  | 987  |
|      |          |   |            | C | 3.8582  | 0.0141  | 0.1492  | 996   | 1019 | 1064 | 1098 |
|      |          |   |            | C | 3.0991  | 1.1973  | 0.1130  | 1111  | 1163 | 1188 | 1202 |
|      |          |   |            | H | 3.8092  | -2.1240 | 0.1221  | 1236  | 1260 | 1310 | 1345 |
|      |          |   |            | H | 4.9381  | 0.0747  | 0.2171  | 1355  | 1383 | 1437 | 1453 |
|      |          |   |            | H | 3.5967  | 2.1585  | 0.1519  | 1465  | 1511 | 1582 | 1616 |
|      |          |   |            | C | 1.0331  | 2.4220  | -0.0107 | 1623  | 1645 | 2071 | 2190 |
|      |          |   |            | C | 0.5466  | 3.5253  | -0.0384 | 3130  | 3146 | 3158 | 3162 |
|      |          |   |            | H | 0.1089  | 4.4934  | -0.0660 | 3174  | 3180 | 3184 | 3196 |
|      |          |   |            | H | -2.0640 | -1.5685 | -0.2264 | 3238  | 3408 | 3471 |      |
|      |          |   |            | C | -2.1646 | 1.3590  | -0.1198 |       |      |      |      |
|      |          |   |            | H | -1.4171 | 2.1128  | -0.0335 |       |      |      |      |
|      |          |   |            | C | -3.2500 | 0.8087  | -0.2061 |       |      |      |      |
|      |          |   |            | C | -4.4421 | 0.0687  | -0.3448 |       |      |      |      |
|      |          |   |            | H | -4.7870 | -0.0951 | -1.3637 |       |      |      |      |
|      |          |   |            | C | -5.1634 | -0.4225 | 0.6802  |       |      |      |      |
|      |          |   |            | H | -4.8575 | -0.2773 | 1.7094  |       |      |      |      |
|      |          |   |            | H | -6.0754 | -0.9782 | 0.4997  |       |      |      |      |
| TS24 | 0.202104 | A | 2099.36290 | C | -0.2826 | -2.2159 | -0.1023 | -1725 | 36   | 57   | 92   |
|      |          | B | 4585.77019 | C | -0.3114 | -0.8300 | -0.0996 | 121   | 154  | 183  | 222  |
|      |          | C | 6580.90465 | C | 0.9164  | -0.0931 | -0.0213 | 235   | 304  | 321  | 340  |
|      |          |   |            | C | 2.1483  | -0.8200 | 0.0518  | 374   | 396  | 474  | 494  |
|      |          |   |            | C | 2.1239  | -2.2381 | 0.0457  | 509   | 533  | 548  | 552  |
|      |          |   |            | C | 0.9331  | -2.9199 | -0.0297 | 577   | 590  | 638  | 647  |
|      |          |   |            | C | 0.9628  | 1.3390  | -0.0140 | 660   | 719  | 755  | 772  |
|      |          |   |            | C | 3.3733  | -0.1095 | 0.1292  | 776   | 804  | 828  | 853  |
|      |          |   |            | H | 3.0644  | -2.7756 | 0.1022  | 877   | 885  | 908  | 918  |
|      |          |   |            | H | 0.9222  | -4.0040 | -0.0337 | 935   | 967  | 983  | 991  |
|      |          |   |            | C | 3.3890  | 1.2650  | 0.1347  | 1019  | 1048 | 1103 | 1107 |
|      |          |   |            | C | 2.1847  | 1.9877  | 0.0630  | 1155  | 1189 | 1202 | 1239 |
|      |          |   |            | H | 4.2991  | -0.6720 | 0.1845  | 1253  | 1288 | 1296 | 1365 |
|      |          |   |            | H | 4.3296  | 1.8008  | 0.1944  | 1377  | 1388 | 1429 | 1457 |
|      |          |   |            | H | 2.1980  | 3.0710  | 0.0672  | 1481  | 1499 | 1533 | 1568 |
|      |          |   |            | C | -0.2764 | 2.1018  | -0.0887 | 1607  | 1623 | 1644 | 1832 |
|      |          |   |            | C | -0.6932 | 3.2985  | -0.1140 | 2032  | 3113 | 3147 | 3162 |
|      |          |   |            | H | -1.5334 | 3.9618  | -0.1651 | 3165  | 3178 | 3179 | 3191 |

|      |          |   |            |   |         |         |         |       |      |      |      |
|------|----------|---|------------|---|---------|---------|---------|-------|------|------|------|
|      |          |   |            | H | -1.2193 | -2.7573 | -0.1618 | 3192  | 3242 | 3344 |      |
|      |          |   |            | C | -1.5808 | -0.1293 | -0.1769 |       |      |      |      |
|      |          |   |            | H | -1.2125 | 1.2030  | -0.1481 |       |      |      |      |
|      |          |   |            | C | -2.8264 | -0.2614 | -0.2497 |       |      |      |      |
|      |          |   |            | C | -4.2088 | -0.1702 | -0.3599 |       |      |      |      |
|      |          |   |            | H | -4.6089 | -0.1605 | -1.3731 |       |      |      |      |
|      |          |   |            | C | -5.0786 | -0.1172 | 0.6838  |       |      |      |      |
|      |          |   |            | H | -4.7330 | -0.1306 | 1.7103  |       |      |      |      |
|      |          |   |            | H | -6.1457 | -0.0605 | 0.5104  |       |      |      |      |
| TS26 | 0.206637 | A | 1678.59816 | C | 0.5185  | 1.8837  | -0.1282 | -2060 | 53   | 78   | 126  |
|      |          | B | 4361.71709 | C | 0.3110  | 0.5261  | -0.1171 | 164   | 180  | 203  | 252  |
|      |          | C | 5959.88990 | C | -0.9749 | -0.0191 | -0.0298 | 320   | 360  | 395  | 450  |
|      |          |   |            | C | -2.0846 | 0.8670  | 0.0722  | 458   | 481  | 497  | 507  |
|      |          |   |            | C | -1.8333 | 2.2639  | 0.0904  | 531   | 552  | 596  | 627  |
|      |          |   |            | C | -0.5379 | 2.7806  | 0.0040  | 632   | 684  | 693  | 746  |
|      |          |   |            | C | -1.1239 | -1.4384 | -0.0470 | 758   | 771  | 801  | 805  |
|      |          |   |            | C | -3.3798 | 0.2775  | 0.1559  | 835   | 836  | 907  | 911  |
|      |          |   |            | H | -2.6743 | 2.9464  | 0.1636  | 920   | 951  | 981  | 990  |
|      |          |   |            | H | -0.3835 | 3.8540  | 0.0189  | 998   | 1024 | 1046 | 1062 |
|      |          |   |            | C | -3.5238 | -1.0919 | 0.1378  | 1085  | 1128 | 1144 | 1169 |
|      |          |   |            | C | -2.4059 | -1.9565 | 0.0353  | 1179  | 1203 | 1237 | 1253 |
|      |          |   |            | H | -4.2524 | 0.9172  | 0.2349  | 1309  | 1315 | 1350 | 1381 |
|      |          |   |            | H | -4.5158 | -1.5252 | 0.2016  | 1418  | 1435 | 1440 | 1451 |
|      |          |   |            | H | -2.5611 | -3.0302 | 0.0169  | 1469  | 1518 | 1573 | 1581 |
|      |          |   |            | C | 0.0862  | -2.2468 | -0.1658 | 1596  | 1597 | 1632 | 1652 |
|      |          |   |            | C | 1.3380  | -1.7203 | -0.2361 | 1711  | 3110 | 3137 | 3156 |
|      |          |   |            | H | 2.2000  | -2.3711 | -0.3246 | 3157  | 3160 | 3168 | 3175 |
|      |          |   |            | H | 1.9439  | 1.7316  | -0.2497 | 3183  | 3186 | 3227 |      |
|      |          |   |            | C | 1.5244  | -0.2831 | -0.1885 |       |      |      |      |
|      |          |   |            | H | -0.0378 | -3.3250 | -0.1971 |       |      |      |      |
|      |          |   |            | C | 2.6242  | 0.5106  | -0.2277 |       |      |      |      |
|      |          |   |            | C | 4.0398  | 0.3798  | -0.1570 |       |      |      |      |
|      |          |   |            | H | 4.6225  | 1.0634  | -0.7736 |       |      |      |      |
|      |          |   |            | C | 4.7038  | -0.4925 | 0.6320  |       |      |      |      |
|      |          |   |            | H | 4.1808  | -1.1611 | 1.3063  |       |      |      |      |
|      |          |   |            | H | 5.7864  | -0.5438 | 0.6193  |       |      |      |      |
| TS27 | 0.211684 | A | 1802.24157 | C | -1.1395 | 1.3775  | 0.0608  | -148  | 54   | 118  | 169  |
|      |          | B | 3736.80475 | C | -0.6211 | 0.1029  | 0.0480  | 197   | 216  | 242  | 296  |
|      |          | C | 5497.45166 | C | 0.8166  | 0.0182  | -0.0029 | 377   | 394  | 434  | 460  |
|      |          |   |            | C | 1.6029  | 1.2119  | -0.0490 | 471   | 480  | 503  | 533  |
|      |          |   |            | C | 0.9600  | 2.4770  | -0.0430 | 543   | 585  | 616  | 642  |
|      |          |   |            | C | -0.4180 | 2.5626  | 0.0245  | 656   | 680  | 757  | 764  |
|      |          |   |            | C | 1.4759  | -1.2487 | 0.0341  | 772   | 774  | 798  | 822  |
|      |          |   |            | C | 3.0184  | 1.1037  | -0.0862 | 833   | 877  | 891  | 909  |

|      |          |   |            |   |         |         |         |      |      |      |      |
|------|----------|---|------------|---|---------|---------|---------|------|------|------|------|
|      |          |   |            | H | 1.5659  | 3.3771  | -0.0820 | 953  | 962  | 973  | 980  |
|      |          |   |            | H | -0.9147 | 3.5272  | 0.0389  | 987  | 1010 | 1050 | 1094 |
|      |          |   |            | C | 3.6342  | -0.1279 | -0.0597 | 1117 | 1140 | 1152 | 1182 |
|      |          |   |            | C | 2.8653  | -1.3020 | 0.0063  | 1201 | 1233 | 1240 | 1262 |
|      |          |   |            | H | 3.6095  | 2.0122  | -0.1305 | 1309 | 1320 | 1362 | 1376 |
|      |          |   |            | H | 4.7159  | -0.1956 | -0.0852 | 1412 | 1432 | 1445 | 1457 |
|      |          |   |            | H | 3.3580  | -2.2683 | 0.0356  | 1480 | 1500 | 1527 | 1579 |
|      |          |   |            | C | 0.6640  | -2.4413 | 0.1080  | 1607 | 1614 | 1627 | 1654 |
|      |          |   |            | C | -0.6859 | -2.3804 | 0.1115  | 3109 | 3130 | 3145 | 3152 |
|      |          |   |            | H | -1.2657 | -3.2966 | 0.1489  | 3156 | 3160 | 3167 | 3169 |
|      |          |   |            | C | -1.4219 | -1.1325 | 0.0451  | 3176 | 3185 | 3234 |      |
|      |          |   |            | H | 1.1671  | -3.4016 | 0.1521  |      |      |      |      |
|      |          |   |            | C | -2.7842 | -1.2023 | -0.1551 |      |      |      |      |
|      |          |   |            | C | -3.7317 | -0.1363 | -0.3243 |      |      |      |      |
|      |          |   |            | H | -4.5329 | -0.3364 | -1.0349 |      |      |      |      |
|      |          |   |            | C | -3.7279 | 1.0659  | 0.2966  |      |      |      |      |
|      |          |   |            | H | -4.4522 | 1.8280  | 0.0299  |      |      |      |      |
|      |          |   |            | H | -3.1147 | 1.2653  | 1.1636  |      |      |      |      |
|      |          |   |            | H | -3.1778 | -2.2021 | -0.3246 |      |      |      |      |
| TS28 | 0.207480 | A | 1804.91214 | C | -3.5498 | -0.0598 | 0.0199  | -560 | 96   | 144  | 207  |
|      |          | B | 3299.13279 | C | -2.8851 | 1.1633  | 0.0312  | 225  | 254  | 293  | 316  |
|      |          | C | 5075.30141 | C | -1.4832 | 1.2178  | 0.0182  | 363  | 410  | 412  | 462  |
|      |          |   |            | C | -0.7432 | -0.0015 | -0.0047 | 497  | 506  | 508  | 509  |
|      |          |   |            | C | -1.4320 | -1.2502 | -0.0178 | 544  | 553  | 585  | 595  |
|      |          |   |            | C | -2.8354 | -1.2540 | -0.0053 | 688  | 701  | 720  | 747  |
|      |          |   |            | C | -0.7615 | 2.4586  | 0.0243  | 760  | 780  | 811  | 814  |
|      |          |   |            | C | 0.6818  | 0.0276  | -0.0151 | 821  | 833  | 856  | 910  |
|      |          |   |            | C | 1.3698  | 1.2780  | -0.0195 | 934  | 977  | 979  | 982  |
|      |          |   |            | C | 0.5990  | 2.4864  | 0.0039  | 986  | 993  | 1011 | 1084 |
|      |          |   |            | C | 2.7763  | 1.2841  | -0.0604 | 1109 | 1128 | 1166 | 1167 |
|      |          |   |            | H | 3.2989  | 2.2345  | -0.0843 | 1197 | 1204 | 1226 | 1254 |
|      |          |   |            | C | 3.4924  | 0.0988  | -0.0773 | 1260 | 1267 | 1343 | 1349 |
|      |          |   |            | C | 2.8306  | -1.1380 | -0.0228 | 1398 | 1421 | 1434 | 1453 |
|      |          |   |            | C | 1.4187  | -1.1909 | -0.0381 | 1457 | 1484 | 1504 | 1528 |
|      |          |   |            | C | 0.7010  | -2.4302 | -0.0550 | 1582 | 1618 | 1622 | 1635 |
|      |          |   |            | C | -0.6595 | -2.4595 | -0.0457 | 1657 | 3157 | 3158 | 3161 |
|      |          |   |            | H | -1.1862 | -3.4080 | -0.0574 | 3164 | 3168 | 3174 | 3176 |
|      |          |   |            | H | 1.2679  | -3.3551 | -0.0686 | 3177 | 3185 | 3189 |      |
|      |          |   |            | H | -1.3273 | 3.3843  | 0.0428  |      |      |      |      |
|      |          |   |            | H | -4.6337 | -0.0823 | 0.0299  |      |      |      |      |
|      |          |   |            | H | -3.4505 | 2.0890  | 0.0492  |      |      |      |      |
|      |          |   |            | H | -3.3621 | -2.2023 | -0.0156 |      |      |      |      |
|      |          |   |            | H | 1.1265  | 3.4346  | 0.0047  |      |      |      |      |
|      |          |   |            | H | 4.5756  | 0.1214  | -0.1097 |      |      |      |      |

|   |        |         |         |
|---|--------|---------|---------|
| H | 3.3926 | -2.0570 | -0.1404 |
| H | 3.1786 | -1.5415 | 1.9357  |

---
